1 **A cell fate switch in the *C. elegans* seam cell lineage occurs through modulation**  
2 **of the Wnt asymmetry pathway in response to temperature increase.**

3

4

5 Mark Hintze<sup>1, †</sup>, Sneha L. Koneru<sup>1, †</sup>, Sophie P.R. Gilbert<sup>1, †</sup>, Dimitris Katsanos and Michalis  
6 Barkoulas<sup>1, \*</sup>

7 <sup>1</sup> Department of Life Sciences, Imperial College, London SW7 2AZ, United Kingdom.

8 † These authors contributed equally to this work.

9

10 Running title: Robustness of seam cell patterning

11

12 Keywords: seam cells; epidermis; temperature; Wnt pathway; cryptic genetic variation;  
13 robustness

14

15 \*Correspondence:

16 Dr. Michalis Barkoulas

17 Imperial College London, Department of Life Sciences, SAF building, Imperial College  
18 Road, SW7 2AZ, London, UK

19 m.barkoulas@imperial.ac.uk, tel : +44 0207 5945227

20

21

22

23 **Abstract**

24 Populations often display consistent developmental phenotypes across individuals  
25 despite the inevitable biological stochasticity. Nevertheless, developmental robustness  
26 has limits and systems can fail upon change in the environment or the genetic  
27 background. We use here the seam cells, a population of epidermal stem cells in  
28 *Caenorhabditis elegans*, to study the influence of temperature change and genetic  
29 variation on cell fate. Seam cell development has mostly been studied so far in the lab  
30 reference strain (N2), grown at 20° temperature. We demonstrate that an increase in  
31 culture temperature to 25°, introduces variability in the wild-type seam cell lineage with a  
32 proportion of animals showing an increase in seam cell number. We map this increase to  
33 lineage-specific symmetrisation events of normally asymmetric cell divisions at the final  
34 larval stage, leading to the retention of seam cell fate in both daughter cells. Using  
35 genetics and single molecule imaging, we demonstrate that this symmetrisation occurs  
36 via changes in the Wnt asymmetry pathway, leading to aberrant Wnt target activation in  
37 anterior cell daughters. We find that intrinsic differences in the Wnt asymmetry pathway  
38 already exist between seam cells at 20° and this may sensitise cells towards a cell fate  
39 switch at increased temperature. Finally, we demonstrate that wild isolates of *C. elegans*  
40 display variation in seam cell sensitivity to increased culture temperature, although seam  
41 cell numbers are comparable when raised at 20°. Our results highlight how temperature  
42 can modulate cell fate decisions in an invertebrate model of stem cell patterning.

43

44

45

46

47

## 48 **Introduction**

49 During development, organisms must withstand environmental and genetic perturbations  
50 to produce consistent phenotypes (Felix and Barkoulas 2012). These phenotypes are  
51 often a product of complex developmental events that require a tight balance between cell  
52 division and cell differentiation (Soufi and Dalton 2016). A key example is stem cell  
53 divisions, consisting of highly controlled asymmetric and symmetric patterns, which are  
54 vital for generating cell diversity, as well as maintaining cell numbers in tissues and organs  
55 (Morrison and Kimble 2006; Knoblich 2008). Developmental robustness has inherent  
56 limits and certain perturbations can push a system outside its buffering zone (Braendle  
57 and Felix 2008; Barkoulas *et al.* 2013). In these cases, it is also important to understand  
58 how systems fail by investigating how perturbations precisely modulate developmental  
59 processes. Here we address the question of how changes in environmental temperature  
60 can affect cell fate outcomes using the nematode *C. elegans* as a model system. While it  
61 is well known that increasing or decreasing environmental temperature can change the  
62 development speed in *C. elegans*, the effect of temperature on specific cell division and  
63 fate acquisition events is less well understood. The *C. elegans* adult hermaphrodite  
64 consists of 959 somatic cells with their complete and stereotypical lineage characterised  
65 (Sulston and Horvitz 1977); this, alongside the isogenic nature of *C. elegans* populations,  
66 make it an attractive model to study environmental effects on development.

67 We focus here on the seam cells, which are a population of epidermal cells that are  
68 found along the two lateral sides of the animal body. Seam cell development has been  
69 used as a system to study mechanisms of stem cell patterning in an invertebrate model  
70 (Joshi *et al.* 2010). This is because seam cells show stem cell behaviour during larval  
71 development as they go through reiterative asymmetric divisions, where usually the  
72 posterior daughter retains the seam cell fate, while the anterior daughter differentiates to



73 a neuroblast or acquires hyp7 fate and joins the syncytial epidermis (also known as  
74 hypodermis) (Figure 1A) (Chisholm and Hsiao 2012). *C. elegans* hatch with 10 seam cells  
75 on each lateral side and during the second larval (L2) stage a symmetric division increases  
76 the total seam cell number from 10 cells to 16 (Figure 1A). The exact pattern of seam cell  
77 divisions differs between each lineage in the head (H0-H2 cells), mid-body (V1-V6) and  
78 tail (T) region and over developmental time (Figure 1A). The balance between seam cell  
79 proliferation and differentiation is controlled through transcription factor activity (Koh and  
80 Rothman 2001; Cassata 2005; Nimmo *et al.* 2005; Kagoshima *et al.* 2007; Huang *et al.*  
81 2009; Brabin *et al.* 2011; Gorrepati *et al.* 2013; Hughes *et al.* 2013) and the Wnt/ $\beta$ -catenin  
82 asymmetry pathway (Mizumoto and Sawa 2007b; Sawa and Korswagen 2013; Gorrepati  
83 *et al.* 2015), which is an adaptation of the conserved canonical Wnt signalling pathway in  
84 the context of an asymmetric division. In this case, selective activation of Wnt-dependent  
85 transcription in one of the two seam cell daughters relies on asymmetric localisation of  
86 Wnt components in mother cells that are polarised before division (Takeshita and Sawa  
87 2005; Goldstein *et al.* 2006; Mizumoto and Sawa 2007a; Gleason and Eisenmann 2010;  
88 Baldwin *et al.* 2016).

89 Despite progress made over the last years in identifying key factors contributing to  
90 epidermal development, most studies have been conducted using a single *C. elegans*  
91 isolate grown in a single environment - that is the lab reference strain N2 grown at 20°. It  
92 remains therefore unknown whether changes in the growth environment or the genetic  
93 background would have an impact on seam cell patterning. In this study, we start to  
94 address this question by investigating the effect of different growth temperatures, as well  
95 as genetic backgrounds, on seam cell development. We demonstrate that as culture  
96 temperature is increased within physiological limits (e.g. 25°), populations become more  
97 variable and start producing one extra seam cell on average. We show that this increase

98 in seam cell number occurs via a cell fate switch that is observed reproducibly in specific  
99 cell lineages. This cell fate switch is dependent upon the Hox gene *mab-5* and the beta-  
100 catenin gene *bar-1*, both previously unknown to play a role in the hermaphrodite seam  
101 cell lineage at 20°. We show that at high temperatures, an impaired Wnt asymmetry  
102 pathway leads to ectopic Wnt pathway activation in anterior daughters of specific seam  
103 cells that may already be sensitised regardless of the growth temperature. Finally, we  
104 study here seam cell development for the first time outside N2 and find that wild isolates  
105 of *C. elegans* show a conserved seam cell number at 20°. Nevertheless, by raising  
106 animals at 25°, we reveal cryptic genetic variation between isolates and show that the  
107 sensitivity of the seam cell lineage to higher temperature evolves within *C. elegans*, with  
108 certain isolates showing an enhanced or suppressed response in comparison to N2.  
109 Together, these findings expand our knowledge of developmental system behaviour upon  
110 environmental and genetic perturbation.

111

## 112 **Materials and Methods**

### 113 **Nematode culture and genetics**

114 Strains used in this study were maintained and handled according to standard protocols  
115 (Brenner 1974). The strain JR667 containing a *scm::GFP* transgene (*wls51*) in the N2  
116 background is used as a reference stain and was maintained with OP50 as food source  
117 on standard NGM plates. The *scm::GFP* marker was introgressed from JR667 into wild  
118 isolates JU775, JU2519 and CB4856 together with a *dat-1::GFP* marker using a two-step  
119 cross repeated five times to produce ten times backcrossed strains. In the first step,  
120 hermaphrodites carrying the *vtIs1[dat-1p::GFP] + wls51[scm::gfp]* transgenes linked on  
121 chromosome V were mated to wild-isolate males. In the second step, F1 males from the

122 previous cross were crossed to wild-isolate hermaphrodites. F1 hermaphrodites carrying  
123 both *wls51* and *vtls1* were allowed to self and homozygous progeny for the marker were  
124 considered backcrossed twice. The linkage between the two transgenes (*vtls1* and *wls51*)  
125 was broken at the last step when F1 hermaphrodites, from a cross between wild-isolate  
126 hermaphrodites carrying these transgenes and wild isolate males, were allowed to self.  
127 Recombinant progeny carrying only *wls51* were picked and maintained. *scm::GFP* was  
128 introgressed into wild isolates (JU2007 and XZ1516) by crossing wild isolate males to  
129 JR667 hermaphrodites. F1 males carrying the transgene were crossed to wild isolate  
130 hermaphrodites. This last step was repeated nine times to produce ten times backcrossed  
131 wild isolates. A complete list of strains used in this study is presented in Table S1.

### 132 **Microscopy and phenotypic characterisation**

133 Standard seam cell scorings were performed by mounting animals on 2% agar  
134 pads containing 100  $\mu$ M sodium azide ( $\text{NaN}_3$ ). These were covered with a coverslip and  
135 viewed under a compound microscope (AxioScope A1; Zeiss). Seam cell numbers were  
136 scored at the late L4 or early adult stage focusing on one lateral side per animal.

137 To perform temperature treatments, synchronised animals were prepared by bleaching  
138 adults and placing eggs on standard NGM plates at different temperatures. To quantify  
139 seam cells, animals were collected between 44 and 48 hours for L4s grown at 20° and  
140 between 36 and 40 hours for L4s at 25°. Seam cell duplications were scored based on  
141 the stereotypical position of seam cells in relation to the vulva and in relation to each other.  
142 More specifically, eight seam cells (H0, H1a, H1p, H2, V1a, V1p, V2a, V2p) are anterior  
143 to the vulva, two are adjacent to the vulva (V3a and V3p) and six seam cells are found  
144 posterior to the vulva (V4a, V4p, V5, V6a, V6p, T). In cases of increased seam cell  
145 number, the extra seam cell was assigned, when possible, to the nearest seam cell

146 neighbour at the L4 stage, taking also into account the position of the corresponding seam  
147 cells on the opposite lateral side. Throughout this manuscript, we refer to the anterior and  
148 posterior branch of a seam cell lineage at a given developmental stage as a and p and  
149 their daughters as aa/ap and pa/pp. For example, the V6a lineage at L4 includes V6pappa  
150 (simplified here as V6aa) and V6pappp (V6ap).

151 POP-1 levels were characterised using a strain carrying the transgene *qls74[sys-1p::*  
152 *GFP::POP-1]*. Images of seam cells were analysed using ImageJ. The following formula  
153 was used to calculate the corrected total cell fluorescence (CTCF) in cell nuclei: Integrated  
154 Density – (Area of selected cell × Mean fluorescence of background readings), with three  
155 background readings around the animal taken for each cell pair. Cells with an  
156 anterior/posterior intensity ratio above 1.1 or below 0.9 were classified as anterior >  
157 posterior or anterior < posterior respectively, while cell pairs that had a ratio between 0.9  
158 and 1.1 were classified as equal in fluorescence intensity.

### 159 **RNAi by feeding**

160 Animals were fed with dsRNA expressing bacteria as a food source. HT115  
161 bacteria containing RNAi clones or an empty-vector control were grown overnight and  
162 seeded directly on NGM plates that contained 1 µM IPTG, 25 µg/ml ampicillin and 6.25  
163 µg/ml tetracycline. All RNAi clones used in this study were sequence-validated and come  
164 from the Ahringer RNAi library (Source Bioscience).

### 165 **Cloning**

166 A *dpy-7p::mCherry::H2B::unc-54* cassette was assembled in vector pCFJ906 using  
167 standard three fragment Gateway cloning (Invitrogen). A recovered mimiMos insertion  
168 was crossed to JR667 to generate strain MBA227. To construct a  
169 *pseam::GFP::CAAX::unc-54* transgene, the GFP sequence was amplified using

170 pPD93.65 as template and fused to the following sequence containing the CAAX motif using  
171 nested PCR 5'AAGGACGGAAAGAAGAAGAAGAAGTCCAAGACCAAGTGCATCATG3'. The  
172 GFP::CAAX fragment was then subcloned into pIR5 (Katsanos *et al.* 2017) via Gibson  
173 assembly. A stable integrant was obtained via transgenesis and gamma irradiation. The  
174 resulting line was backcrossed ten times to N2 before crossing to JR667 to generate strain  
175 MBA237.

### 176 **Single molecule fluorescence *in situ* hybridisation**

177 Populations of nematodes were synchronised by bleaching and subsequently fixed in 4%  
178 formaldehyde at appropriate stages for the experiment (17 hours to image L1s and 40 and  
179 44 hours to capture the L4 division at 20° and 25° respectively). smFISH was performed  
180 as previously described (Katsanos *et al.* 2017) using a pool of 27 – 48 oligos fluorescently  
181 labelled with Cy5 (Biomers). Imaging was performed using a motorized epifluorescence  
182 Ti-eclipse microscope (Nikon) and a DU-934 CCD-17291 camera (Andor Technology,  
183 United Kingdom) acquiring 0.8 µm step z-stacks. Image analysis and spot quantification  
184 were performed on raw data using a MATLAB (MathWorks, Natick, MA) routine as  
185 previously described (Barkoulas *et al.* 2013). For all images presented in this study, the  
186 probe signal channel was inverted for clarity (black spots correspond to mRNAs) and  
187 merged to the seam cell channel (GFP) using ImageJ (NIH, Rockville, MD).

### 188 **Data Analysis and availability**

189 Data were analysed and presented with the R programming environment or GraphPad  
190 Prism 7. Two-sample t-tests were performed for differences in mean seam cell number.  
191 Binomial tests were performed to test for differences in the proportion of seam cell  
192 symmetrisation events between strains and/or treatments. All statistics were carried out  
193 in R 3.2.0. All reagents and strains are available upon request. Nematode strains are listed

194 in Table S1. Table S2 contains oligo sequences used as smFISH probes in this study.  
195 Table S3 contains raw counts from smFISH probes for figures 2, 3, 4 and S3.

## 196 **Results**

### 197 **Increase in growth temperature leads to extra seam cells in specific lineages**

198 Seam cell development has been mostly studied so far at the standard growth  
199 temperature of *C. elegans* in the lab, which is 20°. We therefore decided to investigate  
200 whether varying the growth temperature could affect seam cell development. To this end,  
201 we cultured *C. elegans* at a range of temperatures ranging from 15° to 26° and scored  
202 seam cell number based on the expression of an *scm::GFP* marker (*wls51*). We placed  
203 eggs to hatch at different temperatures and scored terminal seam cell number at the end  
204 of the fourth larval stage (L4). At this stage, all somatic divisions are completed, and so  
205 terminal seam cell number acts as a potential read-out for seam cell defects that have  
206 accumulated over post-embryonic development.

207 As expected, populations grown at 20° showed an average seam cell number of  
208 approximately 16 cells per lateral side and low phenotypic variance because of the rare  
209 occurrence of animals displaying 15 or 17 seam cells (Figure 1B). While we found no  
210 statistically significant difference in seam cell number when the culture temperature was  
211 decreased to 15°, we were surprised to see that populations grown at 23° and above  
212 showed a mild, yet statistically significant, increase in terminal seam cell number (Figure  
213 1B,  $P < 0.05$ , two-sample t-test). This increase, due to the frequent occurrence of animals  
214 displaying 17 seam cells instead of the wild-type 16, was most frequent at 25° and 26°.  
215 We decided to use 25° for all subsequent experiments, which is considered to be a viable  
216 physiological temperature for *C. elegans* growth, and is commonly used as an alternative

217 temperature to 20° for example in order to accelerate development or study temperature-  
218 sensitive mutants.

219 We first sought to investigate the developmental basis underlying the increase in  
220 seam cell number at 25°. While scoring seam cell number at different temperatures, we  
221 observed that a frequent error at 25° was the tight clustering of two posterior seam cell  
222 nuclei, a phenotype that we refer to here as “seam cell duplication” for simplicity. We  
223 mapped the frequency of extra seam cells along the axis of the larva and assigned them  
224 to seam cell lineages based on their position relative to the position of their closest seam  
225 cell neighbour. This highlighted a significant hotspot for seam cell duplications at the  
226 anterior V6 lineage (simply here symbolised as V6a but formally V6pappp/V6pappa), with  
227 around 30% of animals in the population showing this phenotype when grown at 25° in  
228 contrast to only 2% at 20° (Figure 1C and D,  $P < 0.001$ , binomial test). Seam cell  
229 duplications were not exclusive to the V6a lineage, but were also observed, albeit with  
230 lower frequency, in the V5, V1a and V2 lineages (Figure 1C and D). This finding indicates  
231 that the various seam cell lineages display different sensitivities to temperature increase.

232 To understand when these duplications occur during post-embryonic development,  
233 we transferred animals at different developmental stages from culture at 20° to 25°. We  
234 found that transferring animals at any stage before L2 resulted in a similar increase in  
235 seam cell number, suggesting that seam cell lineage errors occur after the L2  
236 developmental stage (Figure S1A). By scoring the frequency of extra V6a cells at the later  
237 larval stages in animals raised entirely at 25°, we found that seam cell duplications  
238 occurred during the L4 division (Figure S1B). This observation is consistent with the close  
239 clustering of pairs of nuclei observed at the end of the L4 stage, indicative of a recent  
240 developmental event.

241 The seam cell duplications observed may be a consequence of defects in cell  
242 division or cell differentiation during L4. With regard to cell division defects, one possibility  
243 is that the extra nuclei are a result of a failure of cytokinesis at 25°. To address this  
244 possibility, we used a marker of seam cell membranes to look for multinucleate cells at  
245 L4, but we did not observe any defects in cytokinesis in instances of extra nuclei in the  
246 V6a lineage (Figure S1C). Although we have not formally ruled out the possibility of an  
247 ectopic seam cell division, we believe this is unlikely due to the number of animals we  
248 have observed throughout the L4 stage at 25°, during which we have never observed  
249 evidence of a cell division in addition to the wild-type L4 seam cell division pattern. We  
250 then explored whether, despite the seam cells dividing successfully, the anterior  
251 daughters fail to differentiate into *hyp7*, but instead retain the seam cell fate. Indeed, using  
252 a strain that carries both the seam cell and a *hyp7* cell marker (*dpy-7p::mCherry*), we  
253 found that both cells of the duplicated V6a lineage expressed the seam cell marker alone,  
254 with neither cell expressing the *hyp7* cell marker (Figure 1E). Finally, we reasoned that  
255 the additional seam cell may reflect a timing constraint for V6a daughters to differentiate  
256 before terminal seam cell fusion occurs, since seam cells terminally fuse at the end of the  
257 L4 stage and development is accelerated at 25°. We argue that this is unlikely to be the  
258 case because we found that V6a is not the last seam cell to divide at L4, despite displaying  
259 the highest sensitivity to temperature (Figure S1D). Furthermore, V6a duplications were  
260 still observed in an *aff-1* mutant background, which is impaired in terminal seam cell fusion  
261 (Figure S1E). Taken together, these results indicate that an increase in culture  
262 temperature induces seam cell duplications during the L4 division, due to conversion of  
263 asymmetric cell divisions to symmetric wherein both cells adopt the seam cell fate.

264

265



## 266 **The Hox gene *mab-5* is necessary for seam cell duplications at 25°**

267 Ectopic seam cells at 25° were most frequently found in specific lineages, which  
268 highlights differences in sensitivity to temperature along the nematode body axis. We  
269 therefore decided to investigate whether factors involved in anterior-posterior patterning  
270 can influence the seam cell phenotype in response to temperature increase. Hox genes  
271 are known to be involved in the specification of the animal body axis and play a role in  
272 seam cell patterning as well (Salser and Kenyon 1996; Arata *et al.* 2006). A posterior body  
273 Hox gene, *mab-5*, has been reported to be required for V5 and V6 seam cell lineages in  
274 males to generate sensory rays, while loss of *mab-5* leads to a switch from ray formation  
275 to alae (Salser and Kenyon 1996). To investigate the role of Hox genes on V6a lineage  
276 defects at 25°, we compared terminal seam cell number and frequency of V6a duplication  
277 in three strains carrying individual loss-of-function mutations for the mid and posterior Hox  
278 genes *lin-39*, *egl-5* and *mab-5* (Austin and Kenyon 1994; Salser and Kenyon 1996; Maloof  
279 and Kenyon 1998) (Figure 2A and Figure S2A). We found that only loss of *mab-5* function  
280 significantly suppressed V6a seam cell duplications at 25° (Figure 2A,  $P < 0.001$ , binomial  
281 test), indicating that *mab-5* is necessary for V6a duplication events. In addition, we found  
282 that *mab-5* is required for the maintenance of posterior seam cell fates in hermaphrodites,  
283 as *mab-5* loss-of-function animals lost posterior seam cells at low frequency (Figure S3A).  
284 This seam cell loss is unlikely to affect the comparison between temperatures because  
285 the frequency of V6a loss was similar between 20° and 25° (Figure S3A). To investigate  
286 whether *mab-5* is also sufficient for seam cell duplications, we quantified seam cell  
287 number in a *mab-5* gain-of-function mutant *mab-5(e1751gf)*. In this background, *mab-5*  
288 expression is thought to expand from the posterior to the anterior end due to a *mab-5*  
289 genomic locus duplication (Salser and Kenyon 1992). We confirmed *mab-5* expansion at  
290 the mRNA level with single molecule FISH (smFISH) (Figure S3, B-E). Interestingly, we

291 found that *mab-5(e1751gf)* mutants show a significant increase in ectopic seam cells,  
292 which was observed even at 20° and became more pronounced at 25° with multiple seam  
293 cell lineages showing seam cell duplications (Figure 2, B and C,  $P < 0.001$ , binomial test).

294 Based on the *mab-5* gain-of-function seam cell phenotype, we then hypothesised  
295 that an increase in *mab-5* mRNA levels may underlie the seam cell duplications we  
296 observed at 25°. To address this hypothesis, we quantified *mab-5* expression by smFISH  
297 in posterior seam cells in wild-type animals at the L4 stage. We focused on V5 and V6a  
298 cell daughters, which are very sensitive to fate change in higher temperature, in  
299 comparison to V6p daughters which are less sensitive. Surprisingly, we found a significant  
300 decrease in mRNA expression at 25° compared to 20° (Figure 2D and S3F,  $P < 0.05$ , two-  
301 sample t-test), although the expression of *mab-5* showed a peak in V6aa (formally  
302 V6pappa) both at 20° and 25° degrees, which may relate to the sensitivity of this lineage  
303 to fate change upon temperature increase. Taken together, we conclude that *mab-5* is  
304 necessary and sufficient for seam cell lineage fate changes during L4. However, seam  
305 cell duplications in response to higher temperature are unlikely to be driven at the level of  
306 an increase in *mab-5* mRNA expression.

### 307 **Seam cell duplications require the canonical Wnt pathway component BAR-1**

308 Due to the role of Wnt signalling in controlling seam cell division patterns, we went  
309 on to investigate whether mutations in candidate Wnt components may suppress the V6a  
310 seam cell symmetrisation at 25°. For example, the Frizzled receptor LIN-17 and the  
311 posteriorly produced Wnt ligand EGL-20, have previously been shown to polarise seam  
312 cell divisions and interact with *mab-5* during Q neuroblast migration and (Mizumoto and  
313 Sawa 2007b; Middelkoop and Korswagen 2014). However, we found that mutations in  
314 either of these factors were unable to suppress the V6a duplication (Figure 3A and Figure

315 S2B). Instead, loss of the canonical Wnt pathway beta-catenin *bar-1* led to a significant  
316 decrease in the number of V6 seam cell duplications at 25° compared to wild-type (Figure  
317 3A,  $P < 0.001$ , binomial test). To validate this result, we knocked-down *bar-1* by RNAi and  
318 found that this treatment significantly reduced the number of V6a duplications observed  
319 at 25° in wild-type (Figure 3B,  $P < 0.05$ , binomial test). This *bar-1* RNAi treatment also  
320 suppressed the V6a duplications in the *mab-5(gf)* background (Figure 3B,  $P < 0.001$ ,  
321 binomial test), indicating that *bar-1* is likely to be required for posterior *mab-5* expression  
322 or act in parallel to *mab-5* to facilitate seam cell symmetrisation at 25°.

323         The dependence of seam cell duplication on *bar-1* was surprising as this gene was  
324 not previously thought to play a major role in seam cell development studied at 20°. We  
325 therefore tested if *bar-1* expression could be detected in seam cells, and subsequently if  
326 *bar-1* mRNA levels were changed when animals were cultured at 25°. We were able to  
327 detect *bar-1* expression by smFISH in both anterior and posterior V6 seam cell lineages  
328 at the L4 stage (Figure 3C). However, we found no significant change in mean number of  
329 *bar-1* transcripts in V6aa cells that show the seam cell duplication phenotype at 25° versus  
330 20°. These results indicate that *bar-1* is expressed in seam cells at the time when seam  
331 cell asymmetric division defects occur and suggest that these defects may occur through  
332 a temperature-driven activation of the Wnt pathway in anterior seam cell daughters of the  
333 V6 lineage.

### 334 **Impaired Wnt pathway asymmetry underlies seam cell fate changes**

335         One of the main pathways involved in maintenance of seam cell fate and regulation  
336 of the asymmetric cell division is the Wnt pathway (Gleason and Eisenmann 2010; Sawa  
337 and Korswagen 2013). Following an asymmetric seam cell division, activation of the Wnt  
338 pathway is usually restricted to posterior cell daughters, which express key downstream

339 genes such as the GATA transcription factor *egl-18* and maintain the seam cell  
340 fate (Gleason and Eisenmann 2010; Gorrepati *et al.* 2013). Ectopic activation of the Wnt  
341 pathway in anterior cell daughters has been shown to be sufficient for these cells to adopt  
342 the seam cell fate, in a similar manner to their posterior counterparts. This occurs for  
343 example upon *pop-1/tcf* down-regulation and leads to a dramatic increase in the average  
344 seam cell number (Gleason and Eisenmann 2010). To address whether defects in  
345 asymmetric seam cell division were associated with changes in Wnt pathway activity  
346 localisation, we quantified *egl-18* mRNA expression in animals grown at 20° and 25°  
347 during the L4 division. As expected, we found that at 20° the posterior cell daughters of  
348 V5, V6a and V6p following the L4 asymmetric division all expressed *egl-18* at a higher  
349 level than their anterior sister cells (Figure 4, A and B). Consistent with our findings of  
350 ectopic seam fate retention at 25°, we found that a subset of anterior cells showed at low  
351 frequency expression values near or beyond those anticipated for posterior daughter cells.  
352 V6a anterior daughters in particular showed a noticeable increase in extreme *egl-18*  
353 expression values compared to 20° (Figure 4B, see black lines connecting anterior to  
354 posterior cell pairs). This shift towards high *egl-18* mRNA values in a proportion of V6aa  
355 cells at 25° is likely to underpin the seam cell duplications observed. In addition, we  
356 observed that the posterior V daughter cells that are fated to remain seam cells at 25°  
357 showed significantly less *egl-18* expression than the same cells at 20° (Figure 4B). These  
358 results are indicative of a molecular shift in the L4 division at 25° from an asymmetric  
359 towards a symmetric mode.

360 To test whether *egl-18* plays a functional role in the symmetrisation of L4 seam cell  
361 divisions at 25°, we scored seam cell duplications in an *egl-18* loss-of-function mutant.  
362 We focused on the V6a lineage, which is largely unaffected in this mutant background at  
363 20°, to assess seam cell fate symmetrisation frequency at 25° and found that loss of *egl-*

364 18 activity suppresses the duplication frequency (Figure 4C,  $P < 0.001$ , binomial test).  
365 Taken together, these data support that seam cell duplications may occur due to ectopic  
366 activation of Wnt pathway in anterior seam cell daughters at 25°.

367 Nuclear levels of POP-1 are a good indicator of post-division asymmetry in seam  
368 cells, with high POP-1 levels (usually in anterior daughters) associated with a non-seam  
369 cell fate due to repression of Wnt targets and lower levels (in posterior daughters)  
370 associated with activation of Wnt targets and retention of seam cell fate (Gleason and  
371 Eisenmann 2010). To investigate whether the distribution of POP-1 is changed in seam  
372 cell daughters at 25°, we used a strain carrying POP-1::GFP and compared the levels of  
373 nuclear GFP expression between V6a and V6p seam cell daughters during the L4 division.  
374 We found that a third of V6a cell pairs (V6aa-V6ap) had equivalent POP-1::GFP levels  
375 both at 20° and 25°. This was in contrast to V6p cell pairs (V6pa-V6pp) which maintained  
376 significantly higher levels of POP-1 expression in anterior versus posterior daughters both  
377 at 20° and 25° ( $P$ -value  $< 0.05$ , two-sample t-test) (Figure 4, D and E). We also observed  
378 that the overall level of POP-1::GFP was significantly decreased in all V6a and V6p cell  
379 pairs at 25° during the L4 division (Figure 4F). These results suggest that V6 cells may  
380 have intrinsic differences in Wnt pathway asymmetry, which make them more sensitive to  
381 temperature perturbations. When this is combined with a lowering in the overall amount  
382 of nuclear POP-1 in V6 lineage cells, this sensitivity may lead to a greater chance of  
383 anterior V6a daughter cells retaining a seam cell fate.

### 384 **The genetic background modifies the pattern and frequency of seam cell fate** 385 **changes at 25°**

386 Seam cell development has never been studied in any other *C. elegans* isolate  
387 except for the lab reference strain N2. Over the last few years, several divergent *C.*

388 *C. elegans* strains have been isolated from various locations throughout the world, offering  
389 now the opportunity to study the effect of the genetic background on seam cell patterning  
390 and its robustness to various perturbations, including temperature increase.

391 We sought here to investigate whether seam cell number is robust to standing  
392 genetic variation and whether the observed seam cell duplications in response to higher  
393 temperature could also be observed in other natural isolates. To be able to visualise the  
394 seam cells, we first genetically introgressed the seam cell marker *scm::GFP* into five wild  
395 isolates by repeated backcrossing. We included strains which are known to be significantly  
396 divergent from N2, such as the commonly used Hawaiian isolate CB4856 (Andersen *et*  
397 *al.* 2012). We found that all five isolates we tested had an average of 16 seam cells per  
398 lateral side at 20°, which is the same as N2 (Figure 5A and Figure S4A). However, they  
399 responded differently to temperature increase (Figure 5A and Figure S4A). In particular,  
400 isolate XZ1516 was much more sensitive and showed higher frequency of duplications in  
401 various seam cell lineages when cultured at 25° (Figure 5B and Figure S4, B-D). Isolate  
402 JU2519 showed duplications in lineages (V3) that do not show cell fate defects in N2.  
403 Interestingly, V6a remained the most sensitive cell lineage to temperature increase in all  
404 isolates that were sensitive to temperature. On the other end of the spectrum, seam cells  
405 in one isolate (CB4856) were robust to temperature increase, with the frequency of seam  
406 cell lineage defects being the same between the two growth temperatures of 20° and 25°  
407 (Figure 5, A and B). Together, these results indicate that variation in the genetic  
408 background can both enhance and suppress the seam cell fate changes observed upon  
409 temperature increase.

410

## 411 **Discussion**

412

### 413 **Higher temperatures lead to reproducible cell fate changes in the epidermis**

414           Changes in temperature can have remarkable effects on both the physiology and  
415 development of organisms. For example, temperature decrease is known to extend  
416 lifespan and a recent study in *C. elegans* showed that this acts through reduction of age-  
417 mediated exhaustion of germline stem cells (Lee *et al.* 2019). Temperature can affect core  
418 cellular processes, such as the timing of cell division, which may be directly linked to  
419 temperature-imposed fitness barriers (Begasse *et al.* 2015). We report here that  
420 increasing growth temperature, yet within the physiological range of temperatures for *C.*  
421 *elegans* culture, leads to a gradual increase in the average number of seam cells.  
422 Interestingly, additional seam cells do not occur at random along the body axis of the  
423 animal, but seam lineages display differential sensitivity. For example, we report that V6a,  
424 V5, V1 and V2 cells are hotspots for seam cell duplications in the N2 background. Among  
425 these cells, V6a shows the highest frequency of seam cell duplications, which is in contrast  
426 to its almost insensitive posterior neighbour V6p. This is of note because V6a and V6p  
427 share the same developmental history until their common precursor divides symmetrically  
428 at the L2 stage to generate the two sub-lineages. The stereotypical distribution of seam  
429 cell duplications highlights that intrinsic differences may sensitise seam cells to respond  
430 to temperature-dependent changes affecting critical developmental signals that influence  
431 stem cell division and differentiation in the epidermis.

432           With regard to cell fate patterning, a well-studied example of how environmental  
433 changes can affect developmental fidelity is vulva development. Vulva formation is very  
434 robust to temperature change with the frequency of cell fate patterning errors remaining  
435 extremely low within the physiological range of temperatures, while the exact type of errors



436 depends on the environmental pressure (Braendle and Felix 2008). For example, growth  
437 at 25° results in a low frequency (usually less than 1%) of undivided P4.p and P8.p cells,  
438 which are part of the vulval competence group although these cells do not contribute  
439 directly to the formation of the vulva by acquiring (primary or secondary) vulval cell fates  
440 (Braendle and Felix 2008). Vulva development can be more substantially de-buffered via  
441 subjecting animals to extreme non-physiological temperature challenges, such as  
442 transient growth at 30° (Grimbert and Braendle 2014). Similar to the seam, vulval cells  
443 also display cell-specific sensitivities to high temperature, with secondary vulval cells  
444 being more affected than primary cells via a decrease in Notch pathway activity (Grimbert  
445 and Braendle 2014). It will be interesting in the future to establish a mechanistic framework  
446 describing the outcome of cell fate decisions as a function of the growth temperature both  
447 within and beyond the seam cell lineage.

448 **Seam cell lineage defects in response to high temperature are dependent upon the**  
449 **Hox gene *mab-5***

450 The cell-specific sensitivity to duplication along the body axis at 25° led us to  
451 investigate whether Hox genes may be involved in the manifestation of this developmental  
452 phenotype. We found that the posterior Hox gene and *Antennapedia* homolog *mab-5*,  
453 plays a role in hermaphrodite seam cell patterning because it is required for posterior  
454 seam cell maintenance, as well as V6a seam cell duplications in response to temperature  
455 increase. Interestingly, expansion of the *mab-5* expression domain to the anterior end of  
456 the animal leads to a high frequency of anterior seam cell duplications even at 20°,  
457 indicating that *mab-5* may directly trigger, or at least sensitise epidermal cells to convert  
458 from any asymmetric mode of division to a symmetric one. The sensitivity in lineages such  
459 as V2, which is outside the endogenous *mab-5* expression domain but produces extra  
460 seam cells at 25°, highlights that other factors must act in parallel to *mab-5*. For example,



461 the Hox gene *lin-39* is not required for V6a seam cell division symmetrisation at 25° but  
462 might still play a role in the less frequent anterior seam cell duplications as it mildly  
463 suppressed seam cell number increase at 25° (Figure S2A). Although *mab-5* has not been  
464 studied before in the context of hermaphrodite seam cell development, it was previously  
465 known that *mab-5* plays a role in the seam cell lineage in males, where dynamic *mab-5*  
466 expression in the V5 and V6 lineage has been shown to be required for sensory ray  
467 formation by regulating cell fate proliferation and differentiation (Salser and Kenyon 1996;  
468 Hunter *et al.* 1999).

469 Our findings support that *mab-5* is required for the V6a duplication errors in  
470 response to temperature presumably by creating a permissive environment within the  
471 posterior region of the animal for seam cell fate changes to occur in response to  
472 temperature increase. This is supported by the expanded range of cells displaying seam  
473 cell duplications in response to an expanded *mab-5* expression domain. Notably, *mab-5*  
474 may act in a cell-autonomous manner as mRNA expression was detected in anterior  
475 daughter cells before these differentiate to become hyp7. Interestingly, *mab-5* mRNA  
476 levels showed a maximum at V6a, which is the very same cell that also displays the  
477 highest frequency of symmetrisation at 25°. This raises the possibility that *mab-5* levels  
478 may relate to the enhanced sensitivity of V6a cells with respect to undergoing a cell fate  
479 change. Higher temperatures are thought to generally increase levels of gene expression,  
480 but this relationship varies from one gene to another (Gomez-Orte *et al.* 2018). We found  
481 no evidence to suggest that an increase in temperature triggers an increase in the  
482 expression of *mab-5*. Taken together, these results are consistent with a model in which  
483 *mab-5* is required for the symmetrisation of division at 25°, although these errors do not  
484 arise due to changes in the levels of *mab-5* transcription. It is interesting that *mab-5* has  
485 been previously reported to be involved in the competence of other epidermal cells to

486 respond to developmental signals, namely the ventral epidermal precursor cells in males,  
487 the most posterior of which give rise to the hook sensillum group [P(9-11).p]. In this  
488 context, *mab-5* is necessary for P(9-11).p cell specification and overexpression in anterior  
489 P(1-8).p cells makes them competent to generate posterior epidermal fates depending on  
490 the activity of the Notch and EGF pathway (Yu *et al.* 2010).

491 **Seam cell fate changes in response to temperature increase may be due to both**  
492 **induced and intrinsic differences in Wnt pathway asymmetry**

493 We present here evidence that symmetrisation of Wnt pathway activity may  
494 underlie the seam cell defects in response to growth at higher temperatures. First, we  
495 found that anterior V6a seam cell daughters show higher *egl-18* expression values at 25°  
496 than their posterior counterparts and at a frequency that matches the penetrance of the  
497 seam cell duplication phenotype, while the posterior cells exhibited overall decreased  
498 expression at 25° compared to 20°. This pattern of *egl-18* expression symmetrisation has  
499 been previously reported in *lin-22* mutants, which also show stochastic symmetrisation of  
500 seam cell divisions along the body axis at late larval stages (Katsanos *et al.* 2017). In  
501 addition to *egl-18* expression, low POP-1 levels are generally thought to correlate with  
502 higher potential of Wnt pathway activation. We found an overall decrease in nuclear POP-  
503 1 levels at 25° in all V cells, which is consistent with the higher probability of finding  
504 additional seam cells. Interestingly, V6a daughter cells appeared more symmetric in POP-  
505 1 levels compared to V6p daughters both at 20 and 25° at the L4 stage, which may explain  
506 the higher sensitivity of V6a cells to increased temperature.

507 With regard to upstream signalling components, we found that *bar-1* suppressed  
508 the seam cell lineage defect at 25°. This is unexpected because asymmetric seam cell  
509 divisions are thought to depend on the beta-catenins WRM-1 and SYS-1, which regulate

510 POP-1 subcellular redistribution and transcriptional activity respectively (Rocheleau *et al.*  
511 1999; Lo *et al.* 2004; Shetty *et al.* 2005; Phillips *et al.* 2007)The potential contribution of  
512 WRM-1 and SYS-1 to the extra seam cells observed in response to temperature was not  
513 investigated due to the temperature sensitivity of the mutants available and their strong  
514 seam cell defects. While *bar-1* is known to modulate Wnt expression through the canonical  
515 molecular pathway (Sawa and Korswagen 2013), its role in seam cell development has  
516 been questioned, partly because of the very mild seam cell defects in *bar-1* loss-of-  
517 function mutants at 20° (Figure S2B). However, we have found that *bar-1* is expressed in  
518 anterior and posterior seam cells and facilitates the seam cell symmetrisation phenotype  
519 at 25°. The activation of *bar-1* has been shown to increase Wnt target genes such as *egl-*  
520 *18* in the epidermis (Gorrepati *et al.* 2013; Jackson *et al.* 2014). This raises the possibility  
521 that ectopic and *bar-1* dependent activation of the Wnt pathway in the anterior V6a  
522 daughter may underlie the seam cell symmetrisation phenotype. It will be interesting to  
523 dissect in the future how increased temperature leads to this activation, with our results  
524 highlighting that intrinsic differences in Wnt pathway asymmetry may sensitise V  
525 cells to divide symmetrically.

## 526 **Background genetic variation influences seam cell development**

527 Cryptic genetic variation refers to genetic variation that is phenotypically silent  
528 under wild-type conditions, yet it can have phenotypic consequences when a biological  
529 system is perturbed (Gibson and Dworkin 2004; Paaby and Rockman 2014). Cryptic  
530 genetic variation can therefore remain neutral in populations but become adaptive or  
531 deleterious upon perturbation, which is thought to relate to the increased prevalence of  
532 certain human diseases in modern times (Gibson and Dworkin 2004; Gibson and Reed  
533 2008). Cryptic genetic variation can be revealed in model organisms via system  
534 perturbations, such as introducing mutations into divergent wild isolate backgrounds or

535 subjecting animals to various environmental treatments. Recent efforts have therefore  
536 succeeded in detecting cryptic genetic variation affecting molecular (Snoek *et al.* 2017) or  
537 developmental processes in *C. elegans* including embryogenesis (Paaby *et al.* 2015),  
538 germ layer specification (Torres Cleuren *et al.* 2019) and vulva development (Milloz *et al.*  
539 2008; Duveau and Felix 2012; Grimbirt and Braendle 2014).

540 We reveal here for the first time cryptic genetic variation underlying seam cell  
541 development by demonstrating that divergent wild *C. elegans* isolates show significant  
542 differences in seam cell number when grown at 25°, while they show a comparable  
543 average seam cell number when grown at the standard growth temperature of 20°. Our  
544 results suggest that differences in the frequency of seam cell duplications over various  
545 lineages among isolates at 25° largely account for the differences in mean seam cell  
546 number. Among all isolates, XZ1516 is the most sensitive strain and displays seam cell  
547 duplications in various cell lineages at 25°. On the other hand, CB4856 is the least  
548 sensitive strain and its average seam cell number was not significantly affected by  
549 temperature. It is currently unclear if CB4856 also shows tolerance to temperature  
550 increase in other development contexts, however, this strain has been reported to show  
551 a preference for colder temperature (Anderson *et al.* 2007). Interestingly, XZ1516 and  
552 CB4856 were both sampled at the same geographic location (Hawaii), which highlights  
553 that the evolution of this developmental phenotype is unlikely to reflect some specific  
554 ecological adaptation. It is also of note that certain isolates displayed changes in the  
555 frequencies of seam cell duplication both within or outside the range of cells that are  
556 affected in the N2 background. For example, isolates JU775 and JU2007 showed  
557 enhanced sensitivity in V1a and V6a, which is similar to N2, whereas JU2519 and XZ1516  
558 showed novel duplications in H1, H2, V3 and T cell lineages. The broad expansion of cell-

559 specific sensitivity observed in strain XZ1516 is reminiscent of the *mab-5* gain of function  
560 phenotype in N2 and may also reflect evolution in key morphogenetic factors.

561 It will be interesting in the future to discover the genetic architecture of cryptic  
562 genetic variation underlying seam cell development. Given the importance of the Wnt  
563 signalling pathway in regulating seam cell development, it is intriguing to speculate that  
564 differences in Wnt pathway activity or sensitivity of the response to Wnt activation among  
565 isolates may underlie the cryptic genetic variation observed. Previous studies have  
566 revealed cryptic genetic variation in cell-specific Ras and Notch pathway activity outputs  
567 in the context of the vulval signalling network (Milloz *et al.* 2008). More recently, cryptic  
568 variation was detected in the contribution of the Wnt input in the gene regulatory network  
569 underlying endoderm specification (Torres Cleuren *et al.* 2019). Quantifying changes in  
570 the abundance of Wnt signalling components among isolates is likely to be challenging at  
571 the whole organism level (Singh *et al.* 2016). Seam cell development may thus offer a  
572 suitable tissue-specific read-out to facilitate the discovery of genetic modifiers influencing  
573 the conserved Wnt signalling pathway, with possible implications in human development  
574 and disease.

575

576

577

578

579

580 **Figure Legends:**

581 **Figure 1: Lineage-specific seam cell duplications occur in higher growth**  
582 **temperature.**

583 **(A)** Schematic showing WT seam cell division patterns across larval stages (green = seam  
584 cell, yellow = hypodermal cell, orange = neuroblast). **(B)** Counts of seam cell nuclei in  
585 JR667 (*wls51[scm::GFP]* used as WT reference) when animals were grown at  
586 temperatures from 15° (blue dots) to 26° (red dots) (\* corresponds to  $P < 0.05$ , \*\*\*\*  
587  $P < 0.0001$ , with one-way ANOVA followed by Dunnett's multiple comparison test,  $n \geq 79$ ).  
588 Error bars represent 95% confidence interval of the mean. **(C)** Heat map displaying  
589 occurrence of errors along the seam axis as temperature increases (upper panel). Lower  
590 panel shows representative images of animals grown at 20° and 25°, yellow labels indicate  
591 extra seam cells in the V6a lineage at 25°. Scale bar is 100  $\mu\text{m}$ . **(D)** Quantification of  
592 percentage of seam cell duplications per individual seam cell. Note that the highest  
593 proportion of duplications was seen in V6a at 25° (\*\* $P < 0.001$  with a binomial test,  $n = 88$   
594 and 106, 20° and 25° respectively). **(E)** In instances of extra nuclei in the V6a lineage,  
595 anterior V6a daughter cells (V6aa) do not express the hypodermal marker *dpy-*  
596 *7p::mCherry* and retain *scm::GFP* expression.

597 **Figure 2: The Hox gene *mab-5* is necessary and sufficient for seam cell**  
598 **duplications.**

599 **(A)** The loss-of-function allele *mab-5(e1239)* suppresses V6a duplications when  
600 compared to WT (N2) at 25° ( $P < 0.001$  with a binomial test), while mutations in *lin-39(n709)*  
601 or *egl-5(n945)* do not display a similar effect,  $n \geq 80$ . Error bars indicate standard error of  
602 the proportion. **(B-C)** *mab-5* gain-of-function mutants (*mab-5e1751gf*, triangle points)  
603 show significant increase in duplications across seam cells both at 20° and 25° compared

604 to WT (circle points) animals (\*\*\*) correspond to  $P < 0.001$  with a binomial test,  $n \geq 40$ ). **(D)**  
605 *mab-5* mRNA levels in V5, V6a and V6p daughter cells measured by smFISH in animals  
606 grown at 25° (red circles,  $n = 28$ ) compared to 20° animals (blue circles,  $n = 29$ ). Levels of  
607 *mab-5* are significantly decreased in V6aa, V6ap and V6pa (\*  $P < 0.05$ , \*\*  $P < 0.01$  with a  
608 two-sample t-test). Error bars indicate standard error of the mean.

609 **Figure 3: The beta-catenin *bar-1* is necessary for V6a duplications.**

610 **(A)** V6a duplications were significantly suppressed in *bar-1(ga80)* mutants at 25°  
611 compared to wild-type animals grown at 20° (\*\*\*)  $P < 0.001$ , binomial test,  $n \geq 90$ ). No  
612 suppression was seen in *egl-20(hu105)* and *lin-17(n671)* mutants,  $n \geq 30$ . **(B)** The  
613 proportion of animals displaying V6a seam cell duplications in WT and *mab-5(e1751gf)*  
614 animals was significantly decreased when grown at 25° on *bar-1* RNAi (\*  $P < 0.05$ , \*\*\*  $P$   
615  $< 0.001$ ,  $n \geq 40$ ). **(C)** mRNA levels of *bar-1*, measured by smFISH, are not significantly  
616 different in animals grown at 20° and 25° in V6a and V6p daughter cells ( $n = \geq 25$ ). Error  
617 bars indicate standard error of the proportion (A, B) or mean (C).

618 **Figure 4: Wnt pathway asymmetry is impaired in V6a daughters.**

619 **(A)** Representative images of *egl-18* smFISH (black dots correspond to mRNAs) in V6a  
620 and V6p daughter cells at 20° and 25°. Seam cells appear green due to expression of the  
621 *scm::GFP* marker. **(B)** Quantification of *egl-18* mRNA levels in V5, V6a and V6p daughters  
622 at 20° and 25°. Expression was significantly lower in posterior cells (V5p, V6ap, and V6pp)  
623 at 25° (red circles) compared to the same seam cells grown at 20° (blue circles, \*\*  $P < 0.01$ ,  
624 \*\*\*  $P < 0.001$  with a two-sample t-test,  $n > 20$  per cell). At low frequency, animals grown at  
625 25° showed extreme expression values in anterior V6aa cells and V5a, which were higher  
626 than their posterior counterparts (these pairs are indicated by black lines). **(C)** Seam cell  
627 duplications at V6a are suppressed in the *egl-18(ga97)* mutant at 25°, (\*\*\*)  $P < 0.001$  with a



628 binomial test,  $n = 120$ ). **(D)** Representative images of nuclear POP-1::GFP expression at  
629 20° and 25°. **(E)** The ratio of nuclear POP-1::GFP expression between V6a and V6p  
630 daughter cells at 20° and 25°,  $n \geq 20$  (\* $P < 0.05$ , \*\*\*  $P < 0.001$ , two-sample t-test, error bars  
631 indicate 95% confidence interval of the mean. **(F)** Average POP-1::GFP intensity in V6a  
632 and V6p daughter cells at 20° and 25° (error bars represent standard error of the mean, \*  
633  $P < 0.05$ , \*\*  $P < 0.001$ , with a two-sample t-test).

634 **Figure 5: Evolution of the frequency of seam cell duplications in wild isolates of *C.***  
635 ***elegans***

636 **(A)** Plot showing average seam cell number at 20° and 25° in N2 (depicted in green),  
637 JU775 (in purple), JU2519 (in pink), JU2007 (in light blue), XZ1516 (in yellow) and CB4856  
638 (in orange). Error bars show 95% confidence interval of the mean. **(B)** Quantification of  
639 seam cell duplications in these isolates at 20° and 25°. Note that some isolates are more  
640 sensitive (JU2519, XZ1516) or less sensitive (CB4856) than N2 to display temperature-  
641 driven seam cell duplications. Statistical comparisons are within strains between 20 and  
642 25° (\*\*\*  $P < 0.001$  with t-test (A) or binomial test (B),  $n \geq 120$  for all strains).

643 **Figure S1: Phenotypic analysis of seam cell duplications in response to**  
644 **temperature increase.**

645 **(A)** Counts of seam cells from N2 (WT) animals shifted to 25° prior to egg hatching or prior  
646 to L2. In both cases, an equivalent increase in seam cell number was observed. **(B)** The  
647 frequency of V6 duplications counted at the end of the L3 and L4 larval stage (\*\*\*  
648 corresponds to  $P$  value  $< 0.001$ , with a binomial test). **(C-D)** Representative images of  
649 posterior seam cells in *scm::GFP; pseam::GFP::CAAX* animals, which display GFP in the  
650 nucleus and membrane of seam cells. **(C)** V6a duplications are not due to cytokinesis  
651 errors as cells separate normally post division. Yellow arrowhead indicates membrane



652 boundary between V6aa and V6ap. (D) V6a is not the last cell to divide. Left image shows  
653 V6p yet to divide, while V6a and V5 are dividing, middle panel displays both V6p and V5  
654 dividing after V6a. (E) V6a duplications still occur in animals lacking *aff-1* activity. Error  
655 bars indicate standard error of the proportion. Scale bars are 10  $\mu\text{m}$  in C and 20  $\mu\text{m}$  in D.

656 **Figure S2: Complete seam cell counts in mutant backgrounds at 20° and 25°.**

657 (A) Counts of seam cells in strains deficient for the Hox genes, *lin-39(n709)*, *mab-*  
658 *5(e1239)* and *egl-5(n945)*. (B) Seam cell counts in strains deficient for the Wnt genes, *egl-*  
659 *20(hu105)*, *lin-17(n671)* and *bar-1(ga80)*. *P*, \*\*\*<0.001 with a two-sample t-test. Error bars  
660 indicate 95% confidence intervals of the mean.

661 **Figure S3: Analysis of *mab-5* expression and function in seam cells.**

662 (A) Posterior seam cell loss in *mab-5(e1239)* animals. Upper panel is a representative  
663 image of V6a loss (yellow arrowhead). Lower panel shows heatmap displaying frequency  
664 of seam cell loss in *mab-5(e1239)* versus WT animals at 20° and 25°. The difference in  
665 the frequency of seam cell loss between the two temperatures is not significant with a  
666 binomial test. (B) Counts of *mab-5* mRNA in L1 animals by smFISH (n=15). Note higher  
667 *mab-5* expression in the posterior side of the animal compared to the anterior. Anterior  
668 and posterior were defined here as before and after V3a respectively. (C-E)  
669 Representative images of *mab-5* smFISH in WT N2 at 20°C, *mab-5(e1751gf)* at 20° and  
670 *mab-5(e1751gf)* at 25°. Yellow arrows show ectopic anterior expression of *mab-5* in the  
671 gain of function mutant background. (F) Representative close-up images of *mab-5* mRNA  
672 expression at 20° and 25° in V6 cells following the L4 division.

673

674 **Figure S4: Wild isolates of *C. elegans* show differences in frequency of seam cell**  
675 **duplications in response to temperature increase.**

676 **(A)** Quantification of seam cells in N2 (Bristol), JU775 (Lisbon), JU2519 (Lisbon), JU2007  
677 (Isle of Wight), XZ1516 (Kehaka) and CB4856 (Honolulu) at 20° and 25°, \*\*\* corresponds  
678 to  $P < 0.001$ , two-sample t-test comparisons between same isolate at 20° and 25°. Error  
679 bars indicate 95% confidence intervals of the mean. **(B)** Representative images of errors  
680 in N2 animals at L4 grown at 20° and 25°, yellow labels indicate extra seam cells in V2,  
681 V5 and V6. **(C)** Representative images of errors in JU2519 grown at 25°, yellow labels  
682 indicate extra seam cells in V1, V3, V4, V5 and V6. **(D)** Representative images of errors  
683 in XZ1516 grown at 25°, yellow labels indicate extra seam cells in H1. Scale bar in green  
684 is 100  $\mu\text{m}$ .

685

## 686 **Acknowledgements**

687 We thank Julien Lambert, Michael Fasseas and Iqrah Razzaq for help with experiments.  
688 Some strains were provided by the CGC, which is funded by NIH Office of Research  
689 Infrastructure Programs (P40 OD010440). This work was supported by the European  
690 Research Council (639485-ROBUSTNET) and the Leverhulme Trust (RPG-2015-235).

691

692 **References:**

- 693 Andersen, E. C., J. P. Gerke, J. A. Shapiro, J. R. Crissman, R. Ghosh *et al.*, 2012  
694 Chromosome-scale selective sweeps shape *Caenorhabditis elegans* genomic  
695 diversity. *Nat Genet* 44: 285-290.
- 696 Anderson, J. L., L. Albergotti, S. Proulx, C. Peden, R. B. Huey *et al.*, 2007 Thermal  
697 preference of *Caenorhabditis elegans*: a null model and empirical tests. *J Exp*  
698 *Biol* 210: 3107-3116.
- 699 Arata, Y., H. Kouike, Y. Zhang, M. A. Herman, H. Okano *et al.*, 2006 Wnt signaling and a  
700 Hox protein cooperatively regulate *psa-3/Meis* to determine daughter cell fate  
701 after asymmetric cell division in *C. elegans*. *Dev Cell* 11: 105-115.
- 702 Austin, J., and C. Kenyon, 1994 Cell contact regulates neuroblast formation in the  
703 *Caenorhabditis elegans* lateral epidermis. *Development* 120: 313-323.
- 704 Baldwin, A. T., A. M. Clemons and B. T. Phillips, 2016 Unique and redundant  $\beta$ -catenin  
705 regulatory roles of two Dishevelled paralogs during *C. elegans* asymmetric cell  
706 division. *Journal of Cell Science* 129: 983-993.
- 707 Barkoulas, M., J. S. van Zon, J. Milloz, A. van Oudenaarden and M. A. Felix, 2013  
708 Robustness and epistasis in the *C. elegans* vulval signaling network revealed by  
709 pathway dosage modulation. *Dev Cell* 24: 64-75.
- 710 Begasse, M. L., M. Leaver, F. Vazquez, S. W. Grill and A. A. Hyman, 2015 Temperature  
711 Dependence of Cell Division Timing Accounts for a Shift in the Thermal Limits of  
712 *C. elegans* and *C. briggsae*. *Cell Rep* 10: 647-653.
- 713 Brabin, C., P. J. Appleford and A. Woollard, 2011 The *Caenorhabditis elegans* GATA  
714 factor ELT-1 works through the cell proliferation regulator BRO-1 and the  
715 Fusogen EFF-1 to maintain the seam stem-like fate. *PLoS Genet* 7: e1002200.

- 716 Braendle, C., and M. A. Felix, 2008 Plasticity and errors of a robust developmental  
717 system in different environments. *Dev Cell* 15: 714-724.
- 718 Brenner, S., 1974 The Genetics of *Caenorhabditis Elegans*. *Genetics* 77: 71-94.
- 719 Cassata, G., 2005 *ceh-16/engrailed* patterns the embryonic epidermis of *Caenorhabditis*  
720 *elegans*. *Development* 132: 739-749.
- 721 Chisholm, A. D., and T. I. Hsiao, 2012 The *Caenorhabditis elegans* epidermis as a  
722 model skin. I: development, patterning, and growth. *Wiley Interdiscip Rev Dev*  
723 *Biol* 1: 861-878.
- 724 Duveau, F., and M. A. Felix, 2012 Role of pleiotropy in the evolution of a cryptic  
725 developmental variation in *Caenorhabditis elegans*. *PLoS Biol* 10: e1001230.
- 726 Felix, M. A., and M. Barkoulas, 2012 Robustness and flexibility in nematode vulva  
727 development. *Trends Genet* 28: 185-195.
- 728 Gibson, G., and I. Dworkin, 2004 Uncovering cryptic genetic variation. *Nat Rev Genet* 5:  
729 681-690.
- 730 Gibson, G., and L. K. Reed, 2008 Cryptic genetic variation. *Current Biology* 18: R989-  
731 R990.
- 732 Gleason, J. E., and D. M. Eisenmann, 2010 Wnt signaling controls the stem cell-like  
733 asymmetric division of the epithelial seam cells during *C. elegans* larval  
734 development. *Dev Biol* 348: 58-66.
- 735 Goldstein, B., H. Takeshita, K. Mizumoto and H. Sawa, 2006 Wnt signals can function  
736 as positional cues in establishing cell polarity. *Dev Cell* 10: 391-396.
- 737 Gomez-Orte, E., E. Cornes, A. Zheleva, B. Saenz-Narciso, M. de Toro *et al.*, 2018 Effect  
738 of the diet type and temperature on the *C. elegans* transcriptome. *Oncotarget* 9:  
739 9556-9571.

- 740 Gorrepati, L., M. W. Krause, W. Chen, T. M. Brodigan, M. Correa-Mendez *et al.*, 2015  
741 Identification of Wnt Pathway Target Genes Regulating the Division and  
742 Differentiation of Larval Seam Cells and Vulval Precursor Cells in *Caenorhabditis*  
743 *elegans*. G3 (Bethesda) 5: 1551-1566.
- 744 Gorrepati, L., K. W. Thompson and D. M. Eisenmann, 2013 *C. elegans* GATA factors  
745 EGL-18 and ELT-6 function downstream of Wnt signaling to maintain the  
746 progenitor fate during larval asymmetric divisions of the seam cells. Development  
747 140: 2093-2102.
- 748 Grimbert, S., and C. Braendle, 2014 Cryptic genetic variation uncovers evolution of  
749 environmentally sensitive parameters in *Caenorhabditis* vulval development. Evol  
750 Dev 16: 278-291.
- 751 Huang, X., E. Tian, Y. Xu and H. Zhang, 2009 The *C. elegans* engrailed homolog *ceh-16*  
752 regulates the self-renewal expansion division of stem cell-like seam cells. Dev  
753 Biol 333: 337-347.
- 754 Hughes, S., C. Brabin, P. J. Appleford and A. Woollard, 2013 CEH-20/Pbx and UNC-  
755 62/Meis function upstream of *mnt-1/Runx* to regulate asymmetric divisions of the  
756 *C. elegans* stem-like seam cells. Biology Open 2: 718-727.
- 757 Hunter, C. P., J. M. Harris, J. N. Maloof and C. Kenyon, 1999 Hox gene expression in a  
758 single *Caenorhabditis elegans* cell is regulated by a caudal homolog and  
759 intercellular signals that inhibit wnt signaling. Development 126: 805-814.
- 760 Jackson, B. M., P. Abete-Luzi, M. W. Krause and D. M. Eisenmann, 2014 Use of an  
761 activated beta-catenin to identify Wnt pathway target genes in *Caenorhabditis*  
762 *elegans*, including a subset of collagen genes expressed in late larval  
763 development. G3 (Bethesda) 4: 733-747.

- 764 Joshi, P. M., M. R. Riddle, N. J. Djabrayan and J. H. Rothman, 2010 *Caenorhabditis*  
765 *elegans* as a model for stem cell biology. *Dev Dyn* 239: 1539-1554.
- 766 Kagoshima, H., R. Nimmo, N. Saad, J. Tanaka, Y. Miwa *et al.*, 2007 The *C. elegans* CBF  
767 beta homologue BRO-1 interacts with the Runx factor, RNT-1, to promote stem  
768 cell proliferation and self-renewal. *Development* 134: 3905-3915.
- 769 Katsanos, D., S. L. Koneru, L. Mestek Boukhibar, N. Gritti, R. Ghose *et al.*, 2017  
770 Stochastic loss and gain of symmetric divisions in the *C. elegans* epidermis  
771 perturbs robustness of stem cell number. *PLoS Biol* 15: e2002429.
- 772 Knoblich, J. A., 2008 Mechanisms of Asymmetric Stem Cell Division. *Cell* 132: 583-597.
- 773 Koh, K., and J. H. Rothman, 2001 ELT-5 and ELT-6 are required continuously to  
774 regulate epidermal seam cell differentiation and cell fusion in *C. elegans*.  
775 *Development* 128: 2867-2880.
- 776 Lee, H. J., A. Noormohammadi, S. Koyuncu, G. Calculli, M. S. Simic *et al.*, 2019  
777 Prostaglandin signals from adult germ stem cells delay somatic aging of  
778 *Caenorhabditis elegans*. *Nat Metab* 1: 790-810.
- 779 Lo, M. C., F. Gay, R. Odom, Y. Shi and R. Lin, 2004 Phosphorylation by the beta-  
780 catenin/MAPK complex promotes 14-3-3-mediated nuclear export of TCF/POP-1  
781 in signal-responsive cells in *C. elegans*. *Cell* 117: 95-106.
- 782 Maloof, J. N., and C. Kenyon, 1998 The Hox gene *lin-39* is required during *C. elegans*  
783 vulval induction to select the outcome of Ras signaling. *Development* 125: 181-  
784 190.
- 785 Middelkoop, T. C., and H. C. Korswagen, 2014 Development and migration of the *C.*  
786 *elegans* Q neuroblasts and their descendants. *WormBook*: 1-23.

- 787 Milloz, J., F. Duveau, I. Nuez and M. A. Felix, 2008 Intraspecific evolution of the  
788 intercellular signaling network underlying a robust developmental system. *Genes*  
789 *Dev* 22: 3064-3075.
- 790 Mizumoto, K., and H. Sawa, 2007a Cortical beta-catenin and APC regulate asymmetric  
791 nuclear beta-catenin localization during asymmetric cell division in *C. elegans*.  
792 *Dev Cell* 12: 287-299.
- 793 Mizumoto, K., and H. Sawa, 2007b Two betas or not two betas: regulation of asymmetric  
794 division by beta-catenin. *Trends Cell Biol* 17: 465-473.
- 795 Morrison, S. J., and J. Kimble, 2006 Asymmetric and symmetric stem-cell divisions in  
796 development and cancer. *Nature* 441: 1068-1074.
- 797 Nimmo, R., A. Antebi and A. Woollard, 2005 *mab-2* encodes RNT-1, a *C. elegans* Runx  
798 homologue essential for controlling cell proliferation in a stem cell-like  
799 developmental lineage. *Development* 132: 5043-5054.
- 800 Paaby, A. B., and M. V. Rockman, 2014 Cryptic genetic variation: evolution's hidden  
801 substrate. *Nat Rev Genet* 15: 247-258.
- 802 Paaby, A. B., A. G. White, D. D. Riccardi, K. C. Gunsalus, F. Piano *et al.*, 2015 Wild  
803 worm embryogenesis harbors ubiquitous polygenic modifier variation. *Elife* 4.
- 804 Phillips, B. T., A. R. Kidd, 3rd, R. King, J. Hardin and J. Kimble, 2007 Reciprocal  
805 asymmetry of SYS-1/beta-catenin and POP-1/TCF controls asymmetric divisions  
806 in *Caenorhabditis elegans*. *Proc Natl Acad Sci U S A* 104: 3231-3236.
- 807 Rocheleau, C. E., J. Yasuda, T. H. Shin, R. Lin, H. Sawa *et al.*, 1999 WRM-1 activates  
808 the LIT-1 protein kinase to transduce anterior/posterior polarity signals in *C.*  
809 *elegans*. *Cell* 97: 717-726.
- 810 Salser, S. J., and C. Kenyon, 1992 Activation of a *C. elegans Antennapedia* homologue  
811 in migrating cells controls their direction of migration. *Nature* 355: 255-258.

- 812 Salser, S. J., and C. Kenyon, 1996 A *C. elegans* Hox gene switches on, off, on and off  
813 again to regulate proliferation, differentiation and morphogenesis. *Development*  
814 122: 1651-1661.
- 815 Sawa, H., and H. C. Korswagen, 2013 Wnt signaling in *C. elegans*. *WormBook*: 1-30.
- 816 Shetty, P., M. C. Lo, S. M. Robertson and R. Lin, 2005 *C. elegans* TCF protein, POP-1,  
817 converts from repressor to activator as a result of Wnt-induced lowering of  
818 nuclear levels. *Dev Biol* 285: 584-592.
- 819 Singh, K. D., B. Roschitzki, L. B. Snoek, J. Grossmann, X. Zheng *et al.*, 2016 Natural  
820 Genetic Variation Influences Protein Abundances in *C. elegans* Developmental  
821 Signalling Pathways. *PLoS One* 11: e0149418.
- 822 Snoek, B. L., M. G. Sterken, R. P. J. Bevers, R. J. M. Volkers, A. Van't Hof *et al.*, 2017  
823 Contribution of trans regulatory eQTL to cryptic genetic variation in *C. elegans*.  
824 *BMC Genomics* 18: 500.
- 825 Soufi, A., and S. Dalton, 2016 Cycling through developmental decisions: how cell cycle  
826 dynamics control pluripotency, differentiation and reprogramming. *Development*  
827 143: 4301-4311.
- 828 Sulston, J. E., and H. R. Horvitz, 1977 Post-embryonic cell lineages of the nematode,  
829 *Caenorhabditis elegans*. *Dev Biol* 56: 110-156.
- 830 Takeshita, H., and H. Sawa, 2005 Asymmetric cortical and nuclear localizations of  
831 WRM-1/beta-catenin during asymmetric cell division in *C. elegans*. *Genes Dev*  
832 19: 1743-1748.
- 833 Torres Cleuren, Y. N., C. K. Ewe, K. C. Chipman, E. R. Mears, C. G. Wood *et al.*, 2019  
834 Extensive intraspecies cryptic variation in an ancient embryonic gene regulatory  
835 network. *Elife* 8.



836 Yu, H., A. Seah and P. W. Sternberg, 2010 Re-programming of *C. elegans* male  
837 epidermal precursor fates by Wnt, Hox, and LIN-12/Notch activities. *Dev Biol* 345:  
838 1-11.  
839

**A**

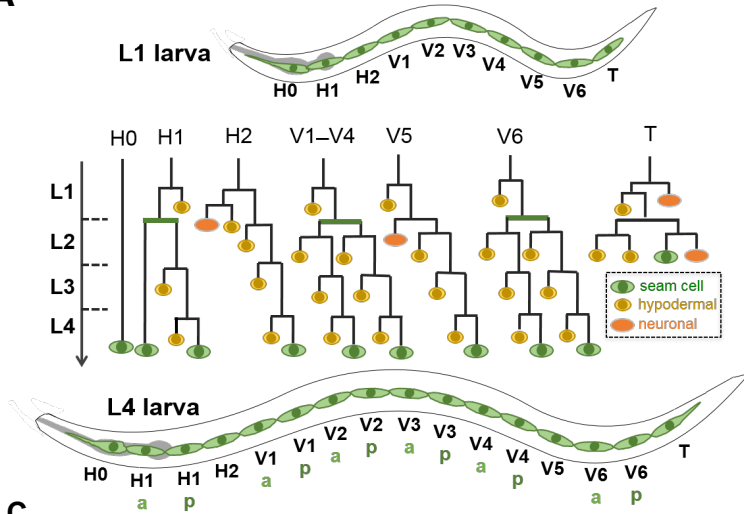

**B**

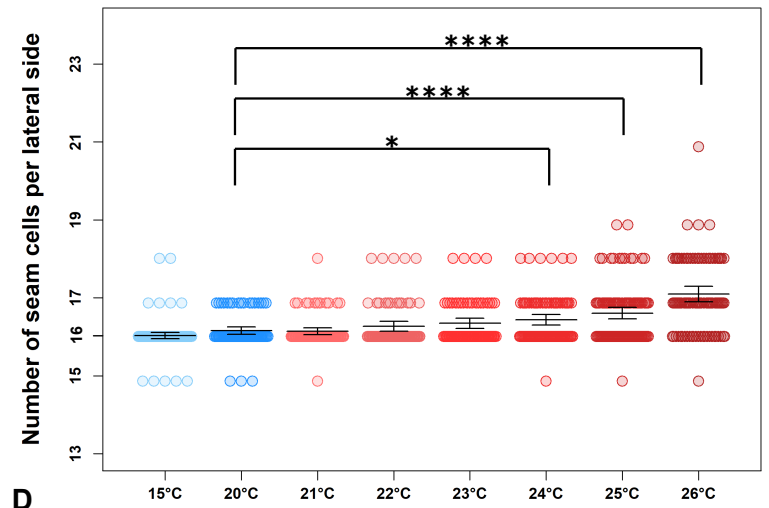

**C**

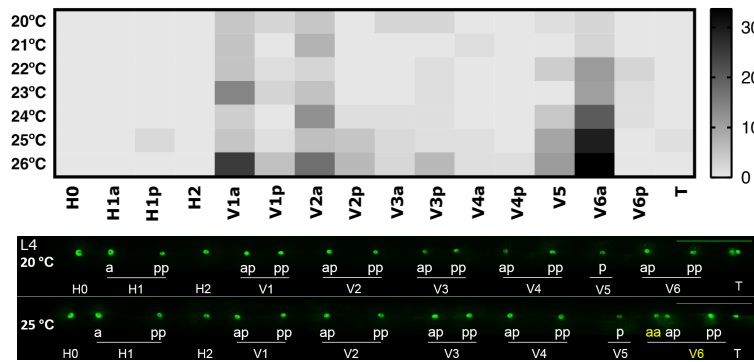

**D**

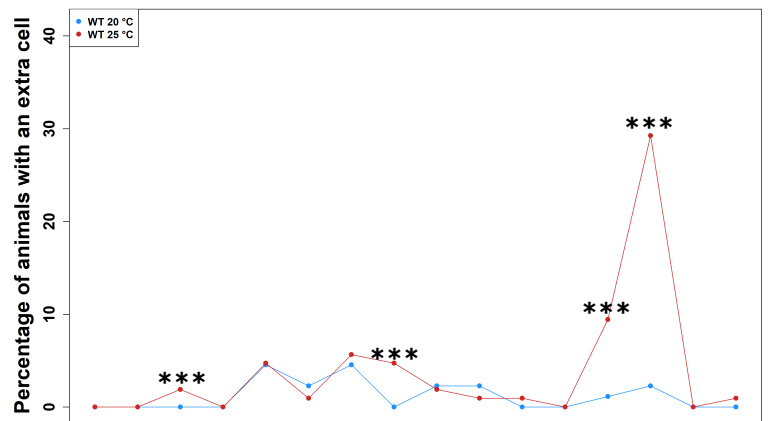

**E**

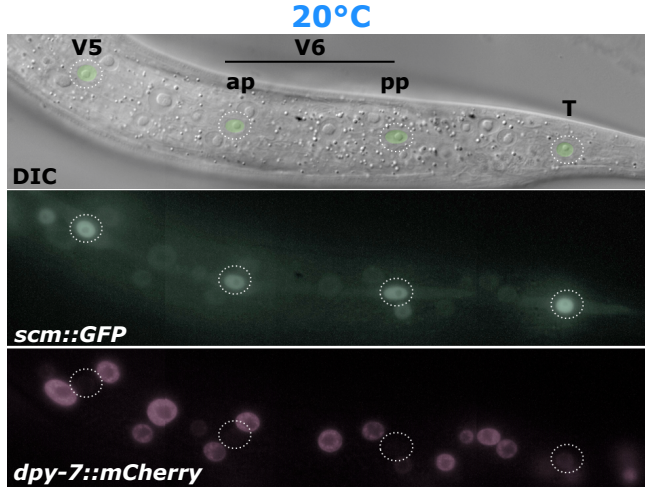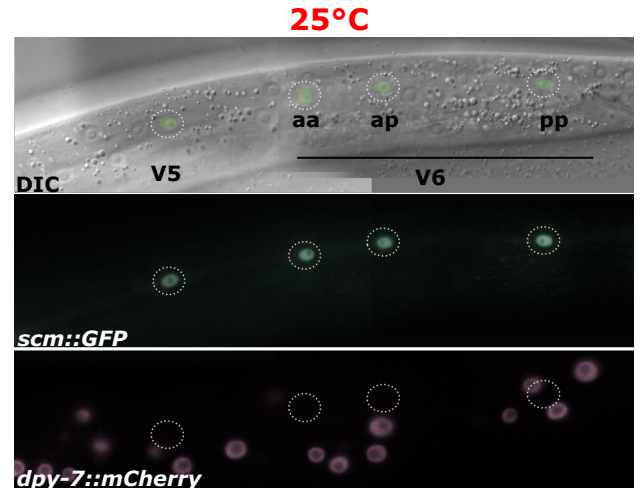

**Figure 1**

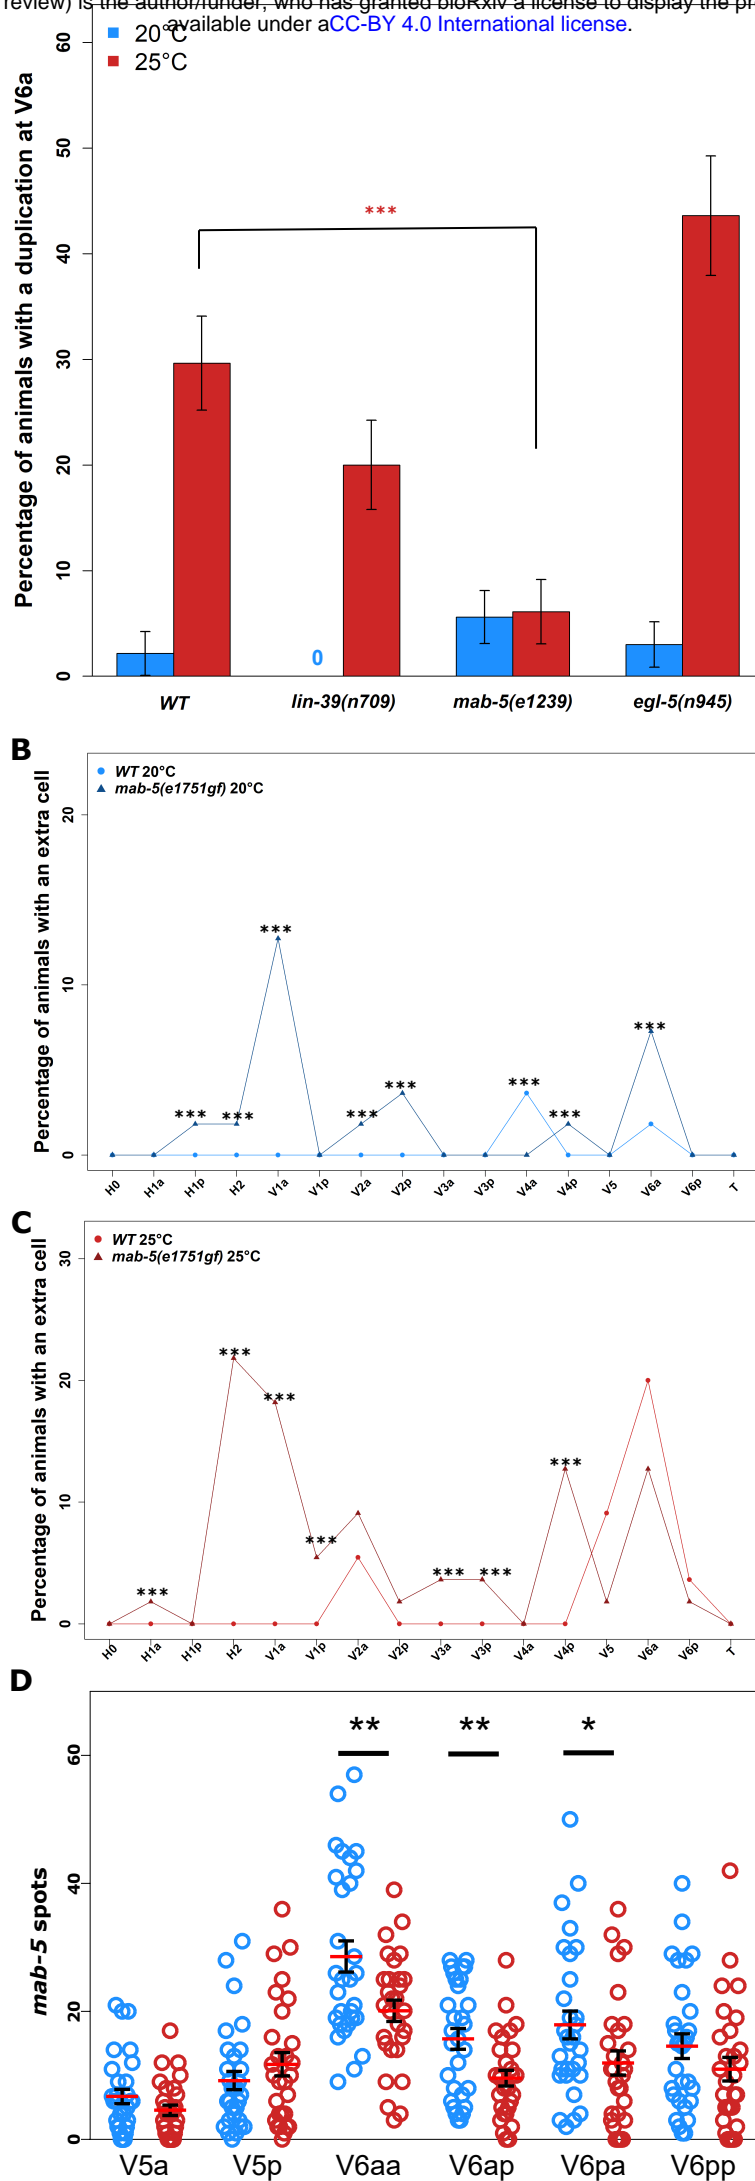

Figure 2

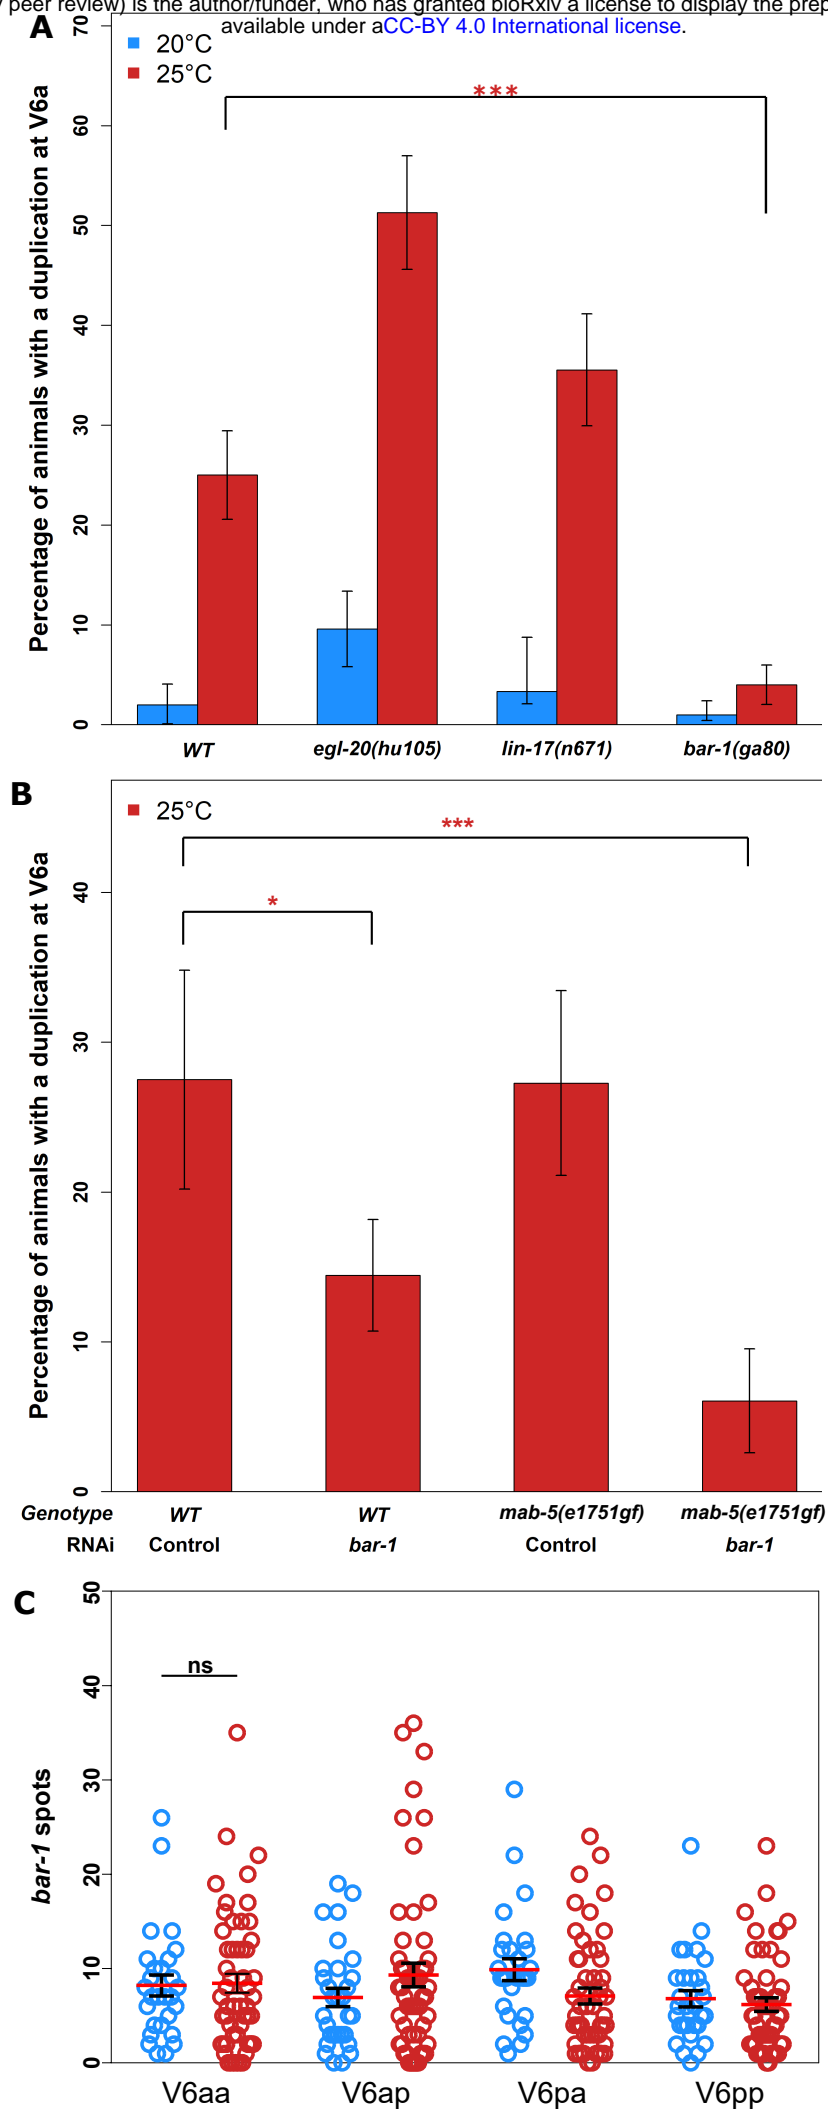

Figure 3

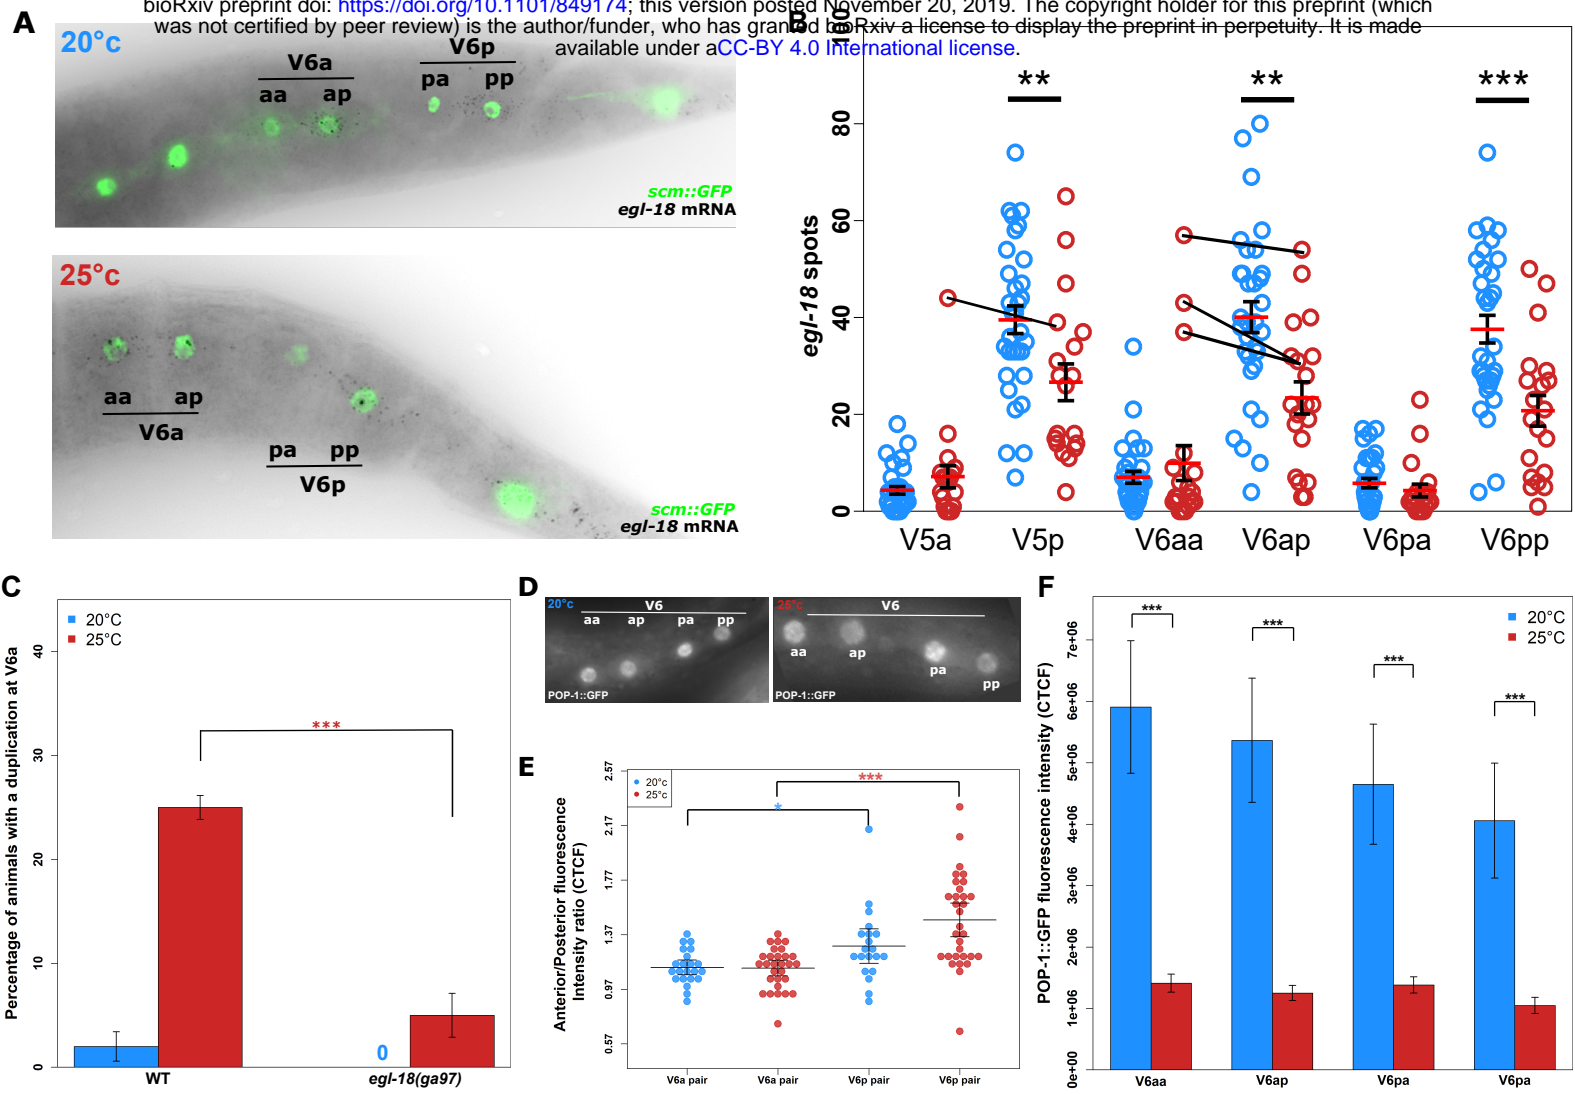

Figure 4

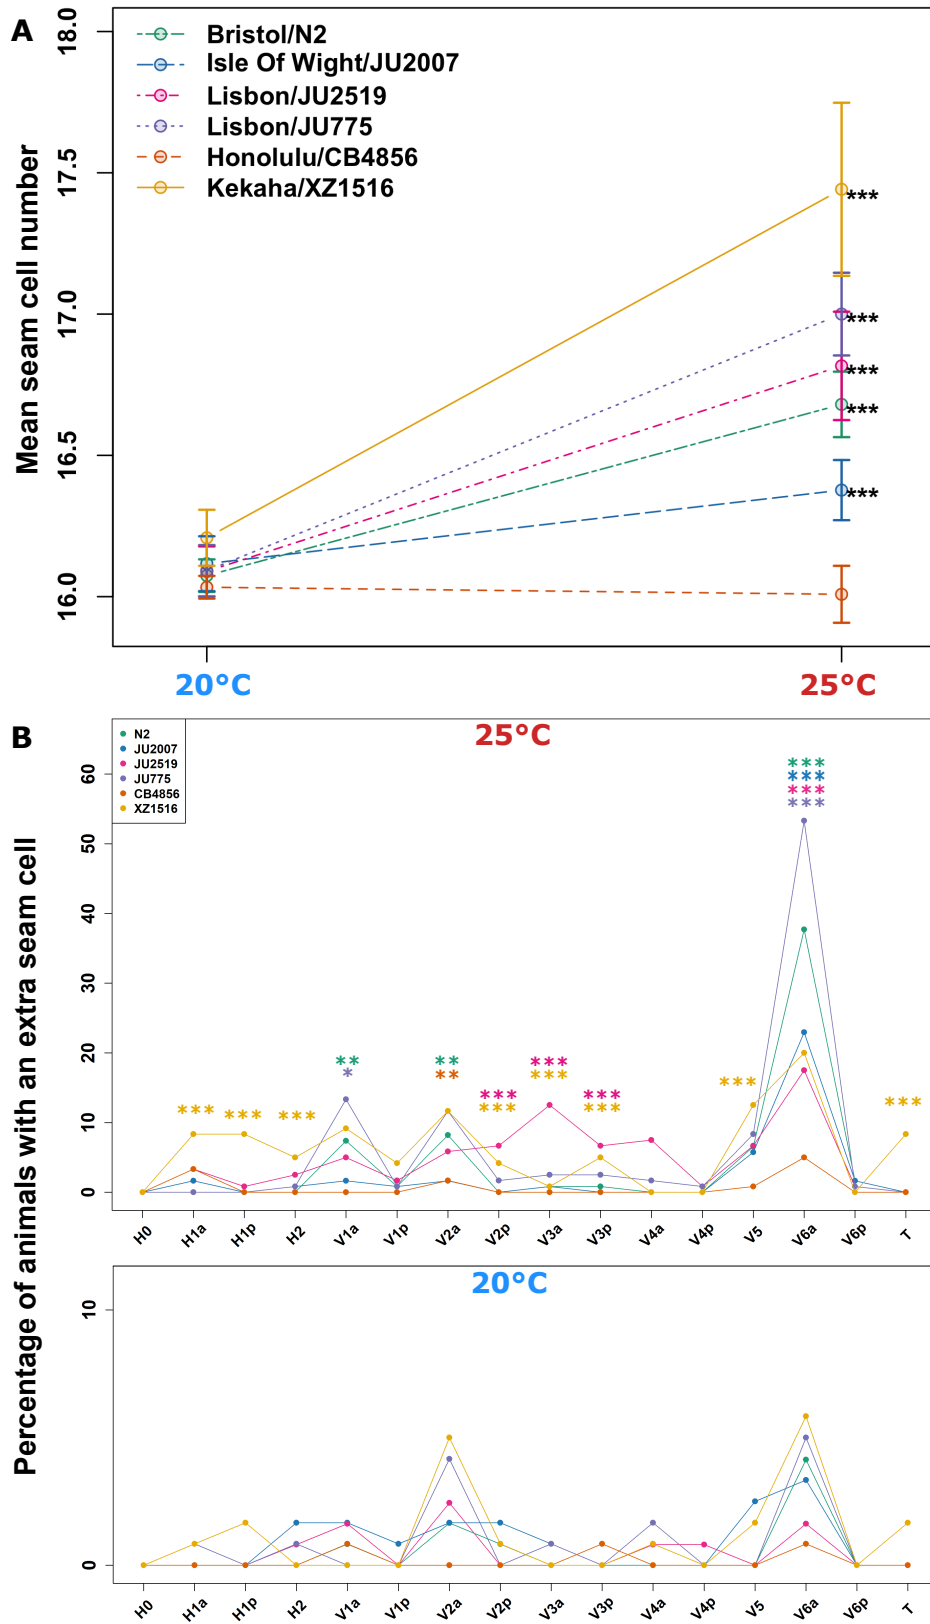

Figure 5

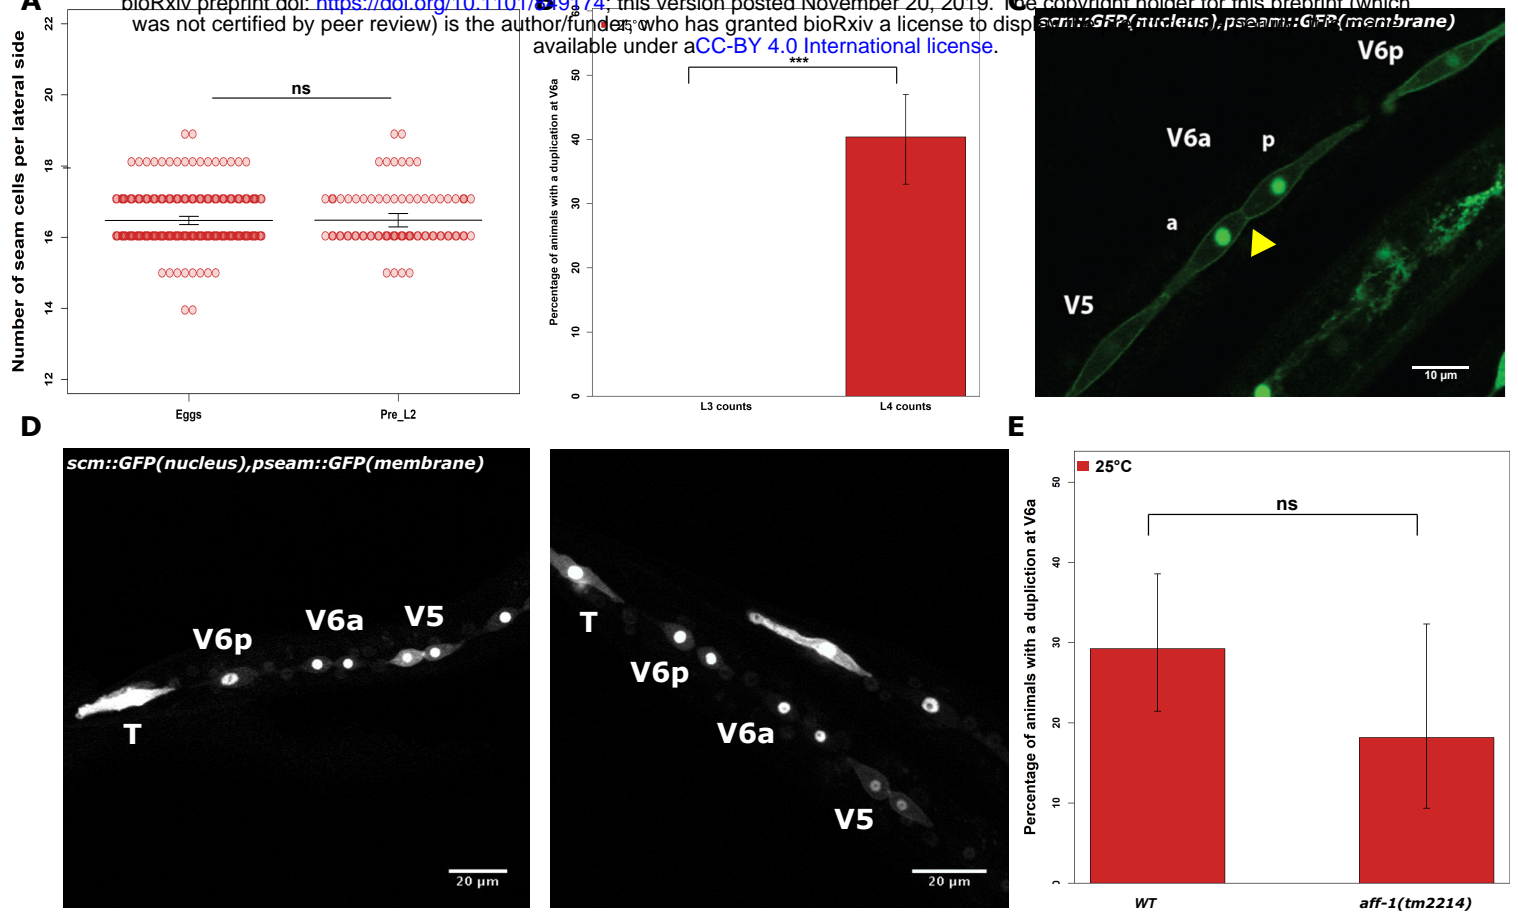

Figure S1

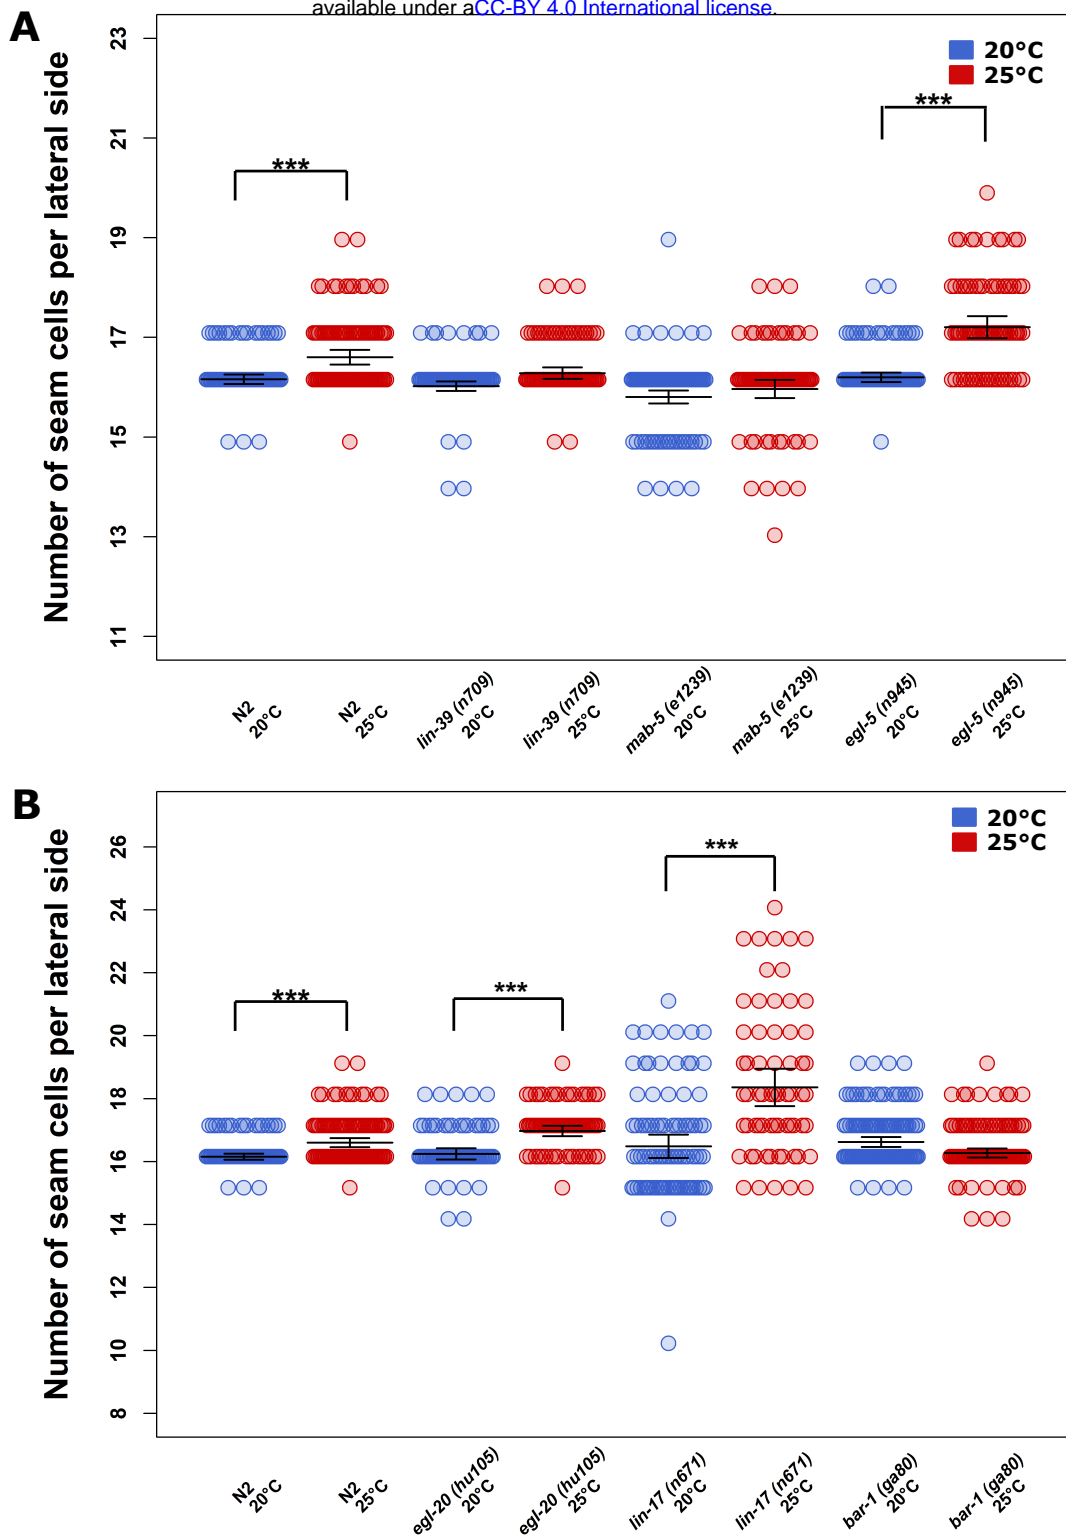

Figure S2



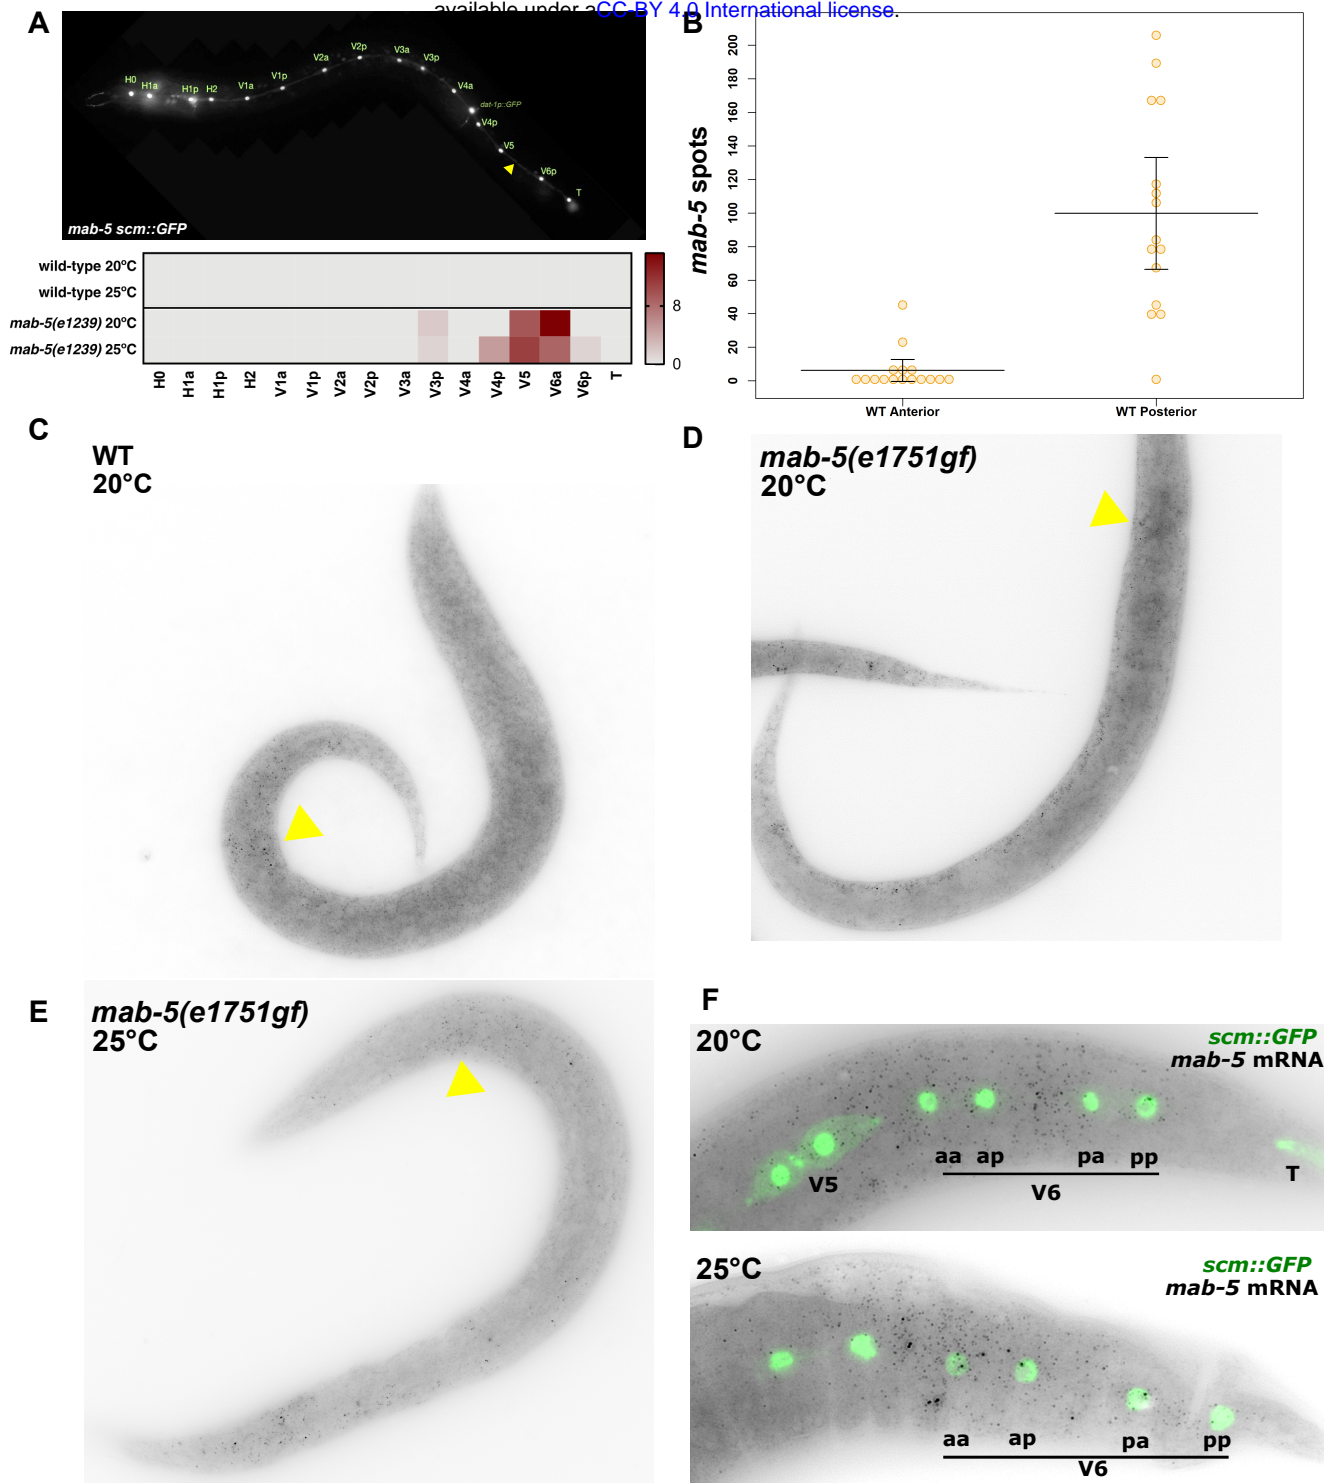

Figure S3

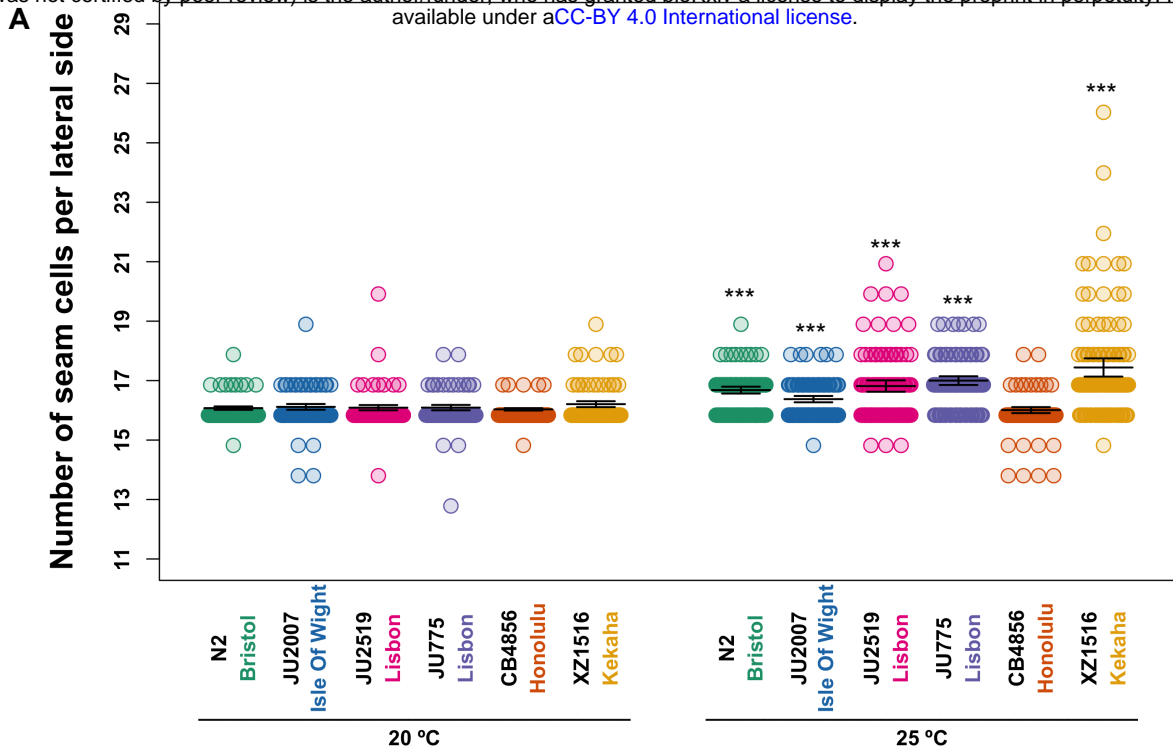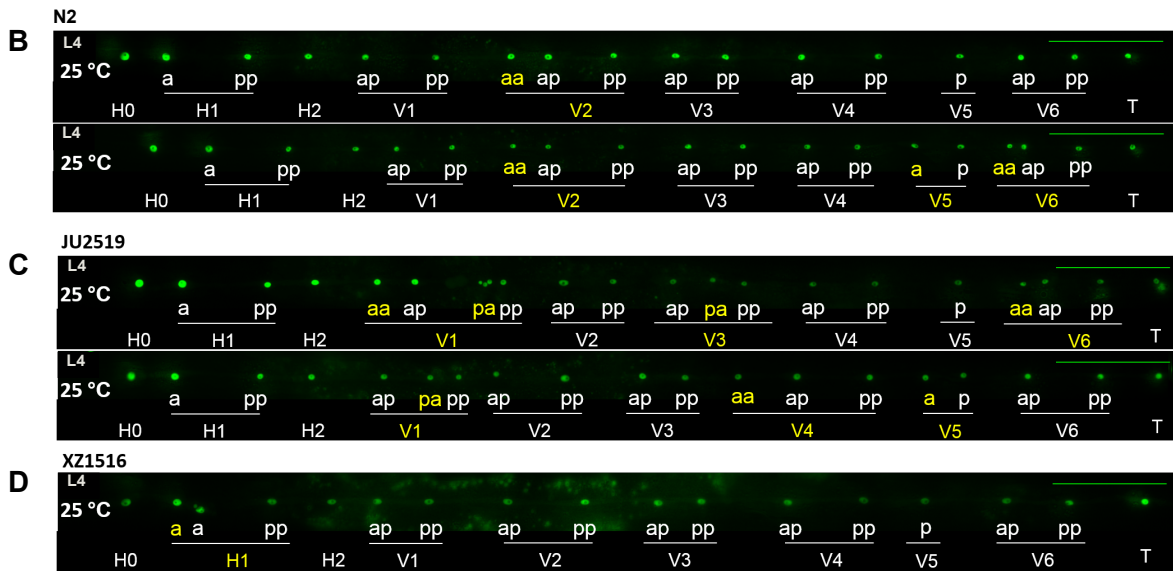

Figure S4

List of strains used in this study

| Strain  | Background | Genotype                                                                            |
|---------|------------|-------------------------------------------------------------------------------------|
| N2      | N2         | wild isolate <i>C. elegans</i>                                                      |
| JR667   | N2         | <i>unc-119(e2498::Tc1) III; wIs51[SCMp::GFP + unc-119(+)] V</i>                     |
| MBA836  | N2         | <i>wIs51[SCMp::GFP + unc-119(+)] V; bar-1(ga80) X</i>                               |
| MBA182  | N2         | <i>mab-5(e1239) III; egl-1[dat-1p::GFP] IV; wIs51[SCMp::GFP + unc-119(+)] V</i>     |
| MBA1029 | N2         | <i>mab-5(e1751) III; wIs51[SCMp::GFP + unc-119(+)] V</i>                            |
| MBA521  | N2         | <i>egl-20(hu105) IV; wIs51[SCMp::GFP + unc-119(+)] V</i>                            |
| MBA206  | N2         | <i>aff-1(tm2214) II; wIs51[SCMp::GFP + unc-119(+)] V</i>                            |
| MBA450  | N2         | <i>lin-17(n671) I; wIs51[SCMp::GFP + unc-119(+)] V</i>                              |
| MBA757  | N2         | <i>egl-5(n945) III; wIs51[SCMp::GFP + unc-119(+)] V</i>                             |
| MBA747  | N2         | <i>lin-39(n1880) III; wIs51[SCMp::GFP + unc-119(+)] V</i>                           |
| MBA290  | N2         | <i>egl-18(ga97) IV; wIs51[SCMp::GFP + unc-119(+)] V</i>                             |
| JK3437  | N2         | <i>him-5(e1490) V; qIs74[sys-1p::GFP::POP-1 + unc-119(+)]</i>                       |
| MBA235  | JU2519     | <i>icbIR3(V, N2&gt;JU2519); wIs51[SCMp::GFP + unc-119(+)] V</i>                     |
| MBA19   | JU2007     | <i>icbIR1(V, N2&gt;JU2007); wIs51[SCMp::GFP + unc-119(+)] V</i>                     |
| MBA248  | JU775      | <i>icbIR4(V, N2&gt;JU775); wIs51[SCMp::GFP + unc-119(+)] V</i>                      |
| MBA256  | CB4856     | <i>icbIR2(V, N2&gt;CB4856); wIs51[SCMp::GFP + unc-119(+)] V</i>                     |
| MBA971  | XZ1516     | <i>icbIR26(V, N2&gt;XZ1516); wIs51[SCMp::GFP + unc-119(+)] V</i>                    |
| MBA227  | N2         | <i>wIs51[SCMp::GFP + unc-119(+)] V; icbSIZ[ppy-7::mCherry::H2B + cb-unc-119(+)]</i> |
| MBA237  | N2         | <i>icbIs3[pseam::GFP::CAAX::unc-54] III; wIs51[SCMp::GFP + unc-119(+)] V</i>        |

| smFISH probes: | <i>egl-18</i>         | <i>mab-5</i>         | <i>bar-1</i>          |
|----------------|-----------------------|----------------------|-----------------------|
|                | cgctcattatgctgatcgaca | catccaggatacatgctcat | gaatagctcgagggtgtgtg  |
|                | agcacttcgctgggtgtgtg  | gttcatgtaggtgtgattgt | ttcattgtttggaaccgct   |
|                | ctacacggctcatctgacgg  | cgcccatcttcatccatgga | gacattccggaaagatcgca  |
|                | cttctgtaactgtttgcaac  | tttacttgtctttcagtcaa | tctgaaagagtggggatcgg  |
|                | tgctgattgtctttgcaaca  | ccagtagcaatcgtcgcctg | cgtgatcccatcaactttt   |
|                | ttgtccattcgctccataac  | cagcaagcatatgtttcata | tcgaactgtgtatactgcc   |
|                | ctcgtcgagccgatactgaa  | ttgattctccaccttttgc  | ctttgtgcacaacctcatta  |
|                | gctcattgttctctttgagc  | acgacgattttggaaccaga | ccatcttcgcaatattttgc  |
|                | gatgagaccgatgagctttt  | aagaagccggttgcggcg   | ccacaattcgagcttcattt  |
|                | cggtgatggtagggctttt   | gatgaattatccatccaacc | acggagaagatcacgcagtg  |
|                | tctcgacaagcttcggagag  | tgaatatgtctgacgagtgc | tgttcccaaagtgaacgaa   |
|                | cctgatactggagcgactac  | ttgcctctttttgtgttc   | caagatcaattccttctgt   |
|                | aagtctggaagtggactcgc  | gtgccggatgatgcggattg | atatcaggttgttctcgat   |
|                | ggatcaaacatgaatccggtt | tgggttataggcgaatggat | tctctgcttatcggacagaa  |
|                | gcatcattccatttgattt   | ctaattccaatgtttgactt | ttgttgacgcgaatgatca   |
|                | ctcacggattgttgattctc  | ttcattgcttccaccttc   | tctaaccacggagtcatatg  |
|                | cacggatttcgattgtggtg  | actagacgatgctgaagcag | tgattttctgttcgggttct  |
|                | gatccattggatcttcaatt  | aatttcagatgttgcttga  | ctctgtgttagtagcatg    |
|                | gactcttctctgtttcacatc | ttgtgataatgaaattcctt | agattggcgagaatttggcg  |
|                | agtgcatacaaaaaggttctg | cttgattgattcttcatct  | ttgtacaagtcgaggactac  |
|                | ggtgctgctaaactgtgctg  | tggcagcagcagcagcggca | tgcttggtacgtcacttata  |
|                | tggtggaggctggaagaac   | attgaagtctagtttcacc  | cagctccagaagagatttca  |
|                | gatgatgatgatggtaggaga | ccgacgtttcctagtcaagt | tgccacacataaactccttg  |
|                | ttcgaatgaccgctgtactt  | gaatgttctcattttgctc  | tcacaagaatgacaaccca   |
|                | ttgaaactgtctggcttgg   | agttcgtaggtttcaaatt  | catctctttgggtggcaattg |
|                | ctcgtctcggttttctcaaa  | tactggttgcgagattgctg | ggctttcaatataatctcc   |
|                | acggattgcagacaagcttc  | gcaatgtttctgaaatttct | gatgtccaacacagagatgc  |
|                | gtgcaatcgatagtagagcc  |                      | gtgtttcagcaatactggtc  |
|                | atttctattggtcggcgaac  |                      | gggatacaactttcagcagg  |
|                | ttgttggatgtggttttgc   |                      | tatctccaattcggcatgat  |
|                | actcttttcttctgttcttt  |                      | ggtacatgccacttcaaaa   |
|                | tggttgaagatctgtgttgc  |                      | gtaatccatcgaggatttg   |
|                | atcgtcggcatttgtgtgag  |                      | cggctattttcaggagtttg  |
|                | ttgaatgtgttgatggctcc  |                      | tggaagagtatgaccatcgc  |
|                | ctcgtgaattgcgagattt   |                      | tcgtgttcttcaacgttg    |
|                | tgctattcatgagctcttga  |                      | catttgctcatgatgatca   |
|                |                       |                      | cgtcatctctgtcaagtacg  |
|                |                       |                      | gacttgctaattcagggatga |
|                |                       |                      | agtattccttcttcttctc   |
|                |                       |                      | atgtgaccaaattggctctc  |
|                |                       |                      | cgctactatttagtgcttcg  |
|                |                       |                      | cggagctgttgcaatacgaa  |
|                |                       |                      | tggggaatggtacattggg   |
|                |                       |                      | ggtccaattgagtattctgg  |
|                |                       |                      | aacaagatgctgtggcatgg  |
|                |                       |                      | ctgttatattgaggaggcgt  |
|                |                       |                      | gtaaactggtggactacggt  |
|                |                       |                      | cgaatgactactcggaccag  |

*mab-5* probe

| 20°C |     |      |      |      |      | 25°C |     |      |      |      |      |
|------|-----|------|------|------|------|------|-----|------|------|------|------|
| V5a  | V5p | V6aa | V6ap | V6pa | V6pp | V5a  | V5p | V6aa | V6ap | V6pa | V6pp |
| 20   | 6   | 19   | 3    | 11   | 2    | 7    | 9   | 16   | 14   | 0    | 5    |
| 7    | 1   | 46   | 8    | 10   | 20   | 4    | 4   | 21   | 7    | 32   | 17   |
| 4    | 24  | 25   | 25   | 25   | 9    | 4    | 13  | 4    | 4    | 13   | 9    |
| 0    | 1   | 18   | 12   | 30   | 7    | 5    | 2   | 34   | 5    | 17   | 6    |
| 14   | 11  | 19   | 7    | 2    | 5    | 4    | 2   | 9    | 4    | 8    | 29   |
| 0    | 6   | 23   | 5    | 37   | 19   | 0    | 20  | 17   | 10   | 15   | 1    |
| 2    | 8   | 26   | 28   | 12   | 13   | 0    | 9   | 25   | 14   | 4    | 16   |
| 6    | 3   | 42   | 6    | 14   | 24   | 0    | 2   | 25   | 10   | 10   | 6    |
| 0    | 8   | 17   | 4    | 33   | 1    | 3    | 2   | 23   | 0    | 11   | 9    |
| 6    | 18  | 19   | 21   | 15   | 7    | 12   | 30  | 22   | 8    | 3    | 29   |
| 1    | 14  | 44   | 4    | 17   | 7    | 6    | 13  | 29   | 17   | 30   | 7    |
| 6    | 6   | 40   | 18   | 11   | 5    | 5    | 3   | 18   | 10   | 18   | 18   |
| 2    | 5   | 20   | 27   | 22   | 0    | 0    | 36  | 9    | 1    | 11   | 2    |
| 4    | 3   | 31   | 8    | 10   | 0    | 9    | 22  | 14   | 3    | 0    | 15   |
| 7    | 8   | 54   | 14   | 50   | 10   | 0    | 29  | 14   | 18   | 6    | 8    |
| 1    | 13  | 13   | 28   | 16   | 17   | 1    | 10  | 29   | 16   | 3    | 28   |
| 5    | 5   | 9    | 19   | 13   | 5    | 8    | 10  | 16   | 6    | 8    | 34   |
| 6    | 14  | 45   | 24   | 16   | 0    | 1    | 1   | 3    | 0    | 0    | 40   |
| 9    | 11  | 21   | 10   | 4    | 12   | 2    | 4   | 32   | 17   | 11   | 17   |
| 3    | 2   | 20   | 5    | 19   | 3    | 2    | 16  | 5    | 5    | 2    | 15   |
| 20   | 28  | 57   | 27   | 40   | 0    | 12   | 25  | 15   | 2    | 0    | 28   |
| 11   | 2   | 39   | 25   | 10   | 28   | 10   | 23  | 25   | 7    | 18   | 20   |
| 12   | 31  | 18   | 27   | 3    | 5    | 0    | 6   | 24   | 8    | 9    | 23   |
| 3    | 2   | 41   | 19   | 19   | 24   | 8    | 0   | 22   | 10   | 14   | 3    |
| 21   | 0   | 45   | 21   | 29   | 13   | 3    | 4   | 28   | 28   | 23   | 1    |
| 14   | 4   | 25   | 26   | 30   | 14   | 17   | 7   | 25   | 11   | 4    | 8    |
| 2    | 17  | 11   | 3    | 11   | 42   | 1    | 12  | 20   | 12   | 36   | 15   |
| 9    | 7   | 26   | 15   | 7    | 16   | 4    | 15  | 39   | 21   | 29   | 3    |
| 0    | 9   | 16   | 17   | 3    |      |      |     |      |      |      | 11   |

*bar-1* probe

| 20°C |      |      |      | 25°C |      |      |      |    |
|------|------|------|------|------|------|------|------|----|
| V6aa | V6ap | V6pa | V6pp | V6aa | V6ap | V6pa | V6pp |    |
|      | 11   | 3    | 13   | 1    | 24   | 6    | 4    | 18 |
|      | 6    | 9    | 18   | 7    | 12   | 13   | 18   | 14 |
|      | 11   | 5    | 9    | 5    | 6    | 17   | 4    | 8  |
|      | 4    | 5    | 2    | 12   | 15   | 16   | 4    | 6  |
|      | 10   | 1    | 12   | 4    | 19   | 3    | 4    | 1  |
|      | 3    | 13   | 2    | 5    | 17   | 10   | 9    | 16 |
|      | 12   | 18   | 9    | 4    | 10   | 6    | 0    | 2  |
|      | 14   | 2    | 9    | 0    | 5    | 9    | 3    | 9  |
|      | 14   | 9    | 10   | 12   | 2    | 6    | 14   | 7  |
|      | 2    | 11   | 3    | 9    | 12   | 9    | 6    | 6  |
|      | 8    | 16   | 8    | 8    | 2    | 8    | 1    | 1  |
|      | 1    | 4    | 11   | 5    | 5    | 10   | 9    | 3  |
|      | 10   | 0    | 6    | 4    | 20   | 3    | 20   | 2  |
|      | 1    | 3    | 9    | 2    | 0    | 11   | 1    | 23 |
|      | 7    | 5    | 10   | 9    | 0    | 6    | 3    | 2  |
|      | 5    | 0    | 5    | 1    | 2    | 2    | 5    | 1  |
|      | 8    | 8    | 9    | 7    | 12   | 3    | 7    | 1  |
|      | 3    | 8    | 1    | 11   | 0    | 6    | 1    | 7  |
|      | 26   | 1    | 29   | 4    | 3    | 0    | 2    | 1  |
|      | 7    | 3    | 12   | 4    | 7    | 1    | 7    | 1  |
|      | 7    | 7    | 5    | 23   | 22   | 16   | 13   | 4  |
|      | 9    | 10   | 9    | 6    | 15   | 33   | 12   | 12 |
|      | 2    | 2    | 4    | 3    | 9    | 26   | 14   | 12 |
|      | 6    | 16   | 9    | 6    | 17   | 26   | 12   | 14 |
|      | 9    | 3    | 12   | 2    | 35   | 36   | 8    | 12 |
|      | 4    | 3    | 13   | 9    | 5    | 35   | 4    | 11 |
|      | 7    | 7    | 16   | 6    | 7    | 29   | 16   | 3  |
|      | 23   | 7    | 22   | 14   | 4    | 7    | 9    | 5  |
|      |      | 10   |      | 9    | 12   | 5    | 6    | 7  |
|      |      | 19   |      | 12   | 1    | 9    | 8    | 2  |
|      |      |      |      |      | 4    | 4    | 4    | 4  |
|      |      |      |      |      | 12   | 1    | 6    | 5  |
|      |      |      |      |      | 5    | 1    | 3    | 3  |
|      |      |      |      |      | 6    | 9    | 24   | 7  |
|      |      |      |      |      | 2    | 7    | 1    | 14 |
|      |      |      |      |      | 9    | 2    | 4    | 1  |
|      |      |      |      |      | 3    | 23   | 3    | 4  |
|      |      |      |      |      | 5    | 1    | 17   | 7  |
|      |      |      |      |      | 0    | 8    | 22   | 8  |
|      |      |      |      |      | 6    | 0    | 5    | 6  |
|      |      |      |      |      | 16   | 4    | 11   | 5  |
|      |      |      |      |      | 15   | 13   | 3    | 3  |
|      |      |      |      |      | 6    | 11   | 1    | 2  |
|      |      |      |      |      | 9    | 8    | 11   | 6  |
|      |      |      |      |      | 14   | 9    | 1    | 15 |
|      |      |      |      |      | 1    | 10   | 11   | 0  |
|      |      |      |      |      | 2    | 1    | 2    | 9  |
|      |      |      |      |      | 13   | 0    | 1    | 3  |
|      |      |      |      |      | 8    | 5    | 0    | 3  |
|      |      |      |      |      | 2    | 10   | 7    | 0  |
|      |      |      |      |      | 0    | 0    | 1    | 5  |
|      |      |      |      |      | 2    | 0    |      | 1  |
|      |      |      |      |      | 8    | 2    |      |    |
|      |      |      |      |      |      | 7    |      |    |

*egl-18* probe

| 20°C |     |      |      |      |      | 25°C |     |      |      |      |      |
|------|-----|------|------|------|------|------|-----|------|------|------|------|
| V5a  | V5p | V6aa | V6ap | V6pa | V6pp | V5a  | V5p | V6aa | V6ap | V6pa | V6pp |
| 10   | 54  | 21   | 54   | 12   | 4    | 8    | 56  | 5    | 7    | 23   | 26   |
| 4    | 41  | 6    | 39   | 11   | 27   | 16   | 14  | 1    | 3    | 16   | 11   |
| 7    | 43  | 4    | 80   | 8    | 74   | 44   | 26  | 43   | 32   | 6    | 41   |
| 1    | 59  | 5    | 69   | 9    | 59   | 8    | 47  | 8    | 39   | 0    | 1    |
| 4    | 35  | 3    | 34   | 16   | 25   | 7    | 37  | 57   | 54   | 2    | 23   |
| 5    | 47  | 13   | 54   | 9    | 47   | 1    | 12  | 12   | 19   | 0    | 21   |
| 4    | 33  | 0    | 21   | 3    | 6    | 4    | 65  | 2    | 49   | 2    | 17   |
| 14   | 62  | 34   | 49   | 11   | 58   | 9    | 31  | 2    | 40   | 0    | 6    |
| 0    | 22  | 5    | 4    | 6    | 58   | 7    | 28  | 37   | 32   | 4    | 47   |
| 1    | 44  | 3    | 38   | 5    | 45   | 0    | 14  | 4    | 15   | 2    | 7    |
| 4    | 33  | 9    | 13   | 2    | 26   | 11   | 39  | 2    | 20   | 1    | 30   |
| 2    | 33  | 4    | 47   | 1    | 54   | 0    | 34  | 3    | 22   | 0    | 50   |
| 0    | 61  | 2    | 58   | 0    | 43   | 6    | 15  | 3    | 6    | 2    | 8    |
| 11   | 74  | 9    | 77   | 17   | 50   | 1    | 13  | 3    | 22   | 3    | 27   |
| 0    | 62  | 2    | 15   | 0    | 23   | 7    | 16  | 6    | 31   | 10   | 15   |
| 0    | 28  | 1    | 33   | 11   | 29   | 0    | 28  | 9    | 28   | 4    | 19   |
| 2    | 12  | 8    | 19   | 1    | 29   | 4    | 16  | 0    | 6    | 3    | 27   |
| 2    | 12  | 2    | 33   | 4    | 34   | 0    | 11  | 0    | 22   | 1    | 29   |
| 18   | 21  | 13   | 49   | 6    | 32   | 3    | 4   | 0    | 3    | 3    | 5    |
| 9    | 41  | 6    | 47   | 2    | 44   |      |     | 2    | 18   | 4    | 5    |
| 2    | 25  | 15   | 48   | 1    | 29   |      |     |      |      |      |      |
| 12   | 49  | 13   | 49   | 17   | 28   |      |     |      |      |      |      |
| 1    | 58  | 1    | 39   | 15   | 52   |      |     |      |      |      |      |
| 2    | 37  | 6    | 30   | 3    | 56   |      |     |      |      |      |      |
| 5    | 34  | 2    | 10   | 0    | 19   |      |     |      |      |      |      |
| 2    | 28  | 2    | 29   | 1    | 31   |      |     |      |      |      |      |
| 3    | 33  | 6    | 56   | 0    | 49   |      |     |      |      |      |      |
| 0    | 7   | 7    | 43   | 3    | 52   |      |     |      |      |      |      |
| 4    | 46  | 6    | 37   | 3    | 44   |      |     |      |      |      |      |
| 1    | 43  | 0    | 32   | 2    | 27   |      |     |      |      |      |      |
| 4    | 36  | 7    | 40   | 6    | 28   |      |     |      |      |      |      |
| 5    | 52  | 10   | 36   | 1    | 21   |      |     |      |      |      |      |

***mab-5*** probe

20°C

| anterior | posterior |
|----------|-----------|
| 5        | 167       |
| 0        | 45        |
| 47       | 113       |
| 1        | 40        |
| 0        | 187       |
| 0        | 117       |
| 3        | 67        |
| 1        | 0         |
| 0        | 78        |
| 2        | 41        |
| 0        | 82        |
| 9        | 208       |
| 21       | 166       |
| 1        | 104       |
| 8        | 81        |
| 0        |           |
